# Supplementary material
Source: PubMed Central journal article supplement (PMC6645132)
Supplement: ao8b01647_si_001.pdf [file ao8b01647_si_001.pdf]

# **Supplementary Materials**

## **How precise are our QSAR derived predictions for new query chemicals?**

Kunal Roy<sup>1\*</sup>, Pravin Ambure<sup>1</sup>, Supratik Kar<sup>2</sup>

<sup>1</sup>Drug Theoretics and Cheminformatics Laboratory,  
Department of Pharmaceutical Technology, Jadavpur University,  
Kolkata 700 032, India

<sup>2</sup>Interdisciplinary Center for Nanotoxicity,  
Department of Chemistry, Physics and Atmospheric Sciences,  
Jackson State University, Jackson, MS-39217, USA

\*Corresponding author

Email: [kunalroy\\_in@yahoo.com](mailto:kunalroy_in@yahoo.com); [kunal.roy@jadavpuruniversity.in](mailto:kunal.roy@jadavpuruniversity.in)

Phone: +91 98315 94140; Fax: +91-33-2837-1078;

URL: <http://sites.google.com/site/kunalroyindia/>

**Table S1** Automated weighting analysis for CDK data set (Model Dataset 1).

| <b>Model</b> | <b>Division method</b> | <b>Best weighting combinations</b> |     |     | <b>% Correct predictions (Test set)</b> | <b>Training set range</b> |
|--------------|------------------------|------------------------------------|-----|-----|-----------------------------------------|---------------------------|
| 1            | Sorted response        | 0.5                                | 0   | 0.5 | 87.84%                                  | 2.3968                    |
|              |                        | 0.5                                | 0.1 | 0.4 |                                         |                           |
|              |                        | 0.5                                | 0.2 | 0.3 |                                         |                           |
|              |                        | 0.5                                | 0.3 | 0.2 |                                         |                           |
|              |                        | 0.5                                | 0.4 | 0.1 |                                         |                           |
|              |                        | 0.5                                | 0.5 | 0   |                                         |                           |
| 2            |                        | 0.5                                | 0   | 0.5 | 86.49%                                  |                           |
|              |                        | 0.5                                | 0.1 | 0.4 |                                         |                           |
|              |                        | 0.5                                | 0.2 | 0.3 |                                         |                           |
|              |                        | 0.5                                | 0.3 | 0.2 |                                         |                           |
|              |                        | 0.5                                | 0.4 | 0.1 |                                         |                           |
|              |                        | 0.5                                | 0.5 | 0   |                                         |                           |
| 3            |                        | 0                                  | 0.5 | 0.5 | 85.14%                                  |                           |
|              |                        | 0                                  | 0.6 | 0.4 |                                         |                           |
|              |                        | 0                                  | 0.7 | 0.3 |                                         |                           |
|              |                        | 0                                  | 0.8 | 0.2 |                                         |                           |
|              |                        | 0                                  | 0.9 | 0.1 |                                         |                           |
|              |                        | 0                                  | 1   | 0   |                                         |                           |
|              |                        | 0.1                                | 0.4 | 0.5 |                                         |                           |
|              |                        | 0.1                                | 0.5 | 0.4 |                                         |                           |
|              |                        | 0.1                                | 0.6 | 0.3 |                                         |                           |
|              |                        | 0.1                                | 0.7 | 0.2 |                                         |                           |
|              |                        | 0.1                                | 0.8 | 0.1 |                                         |                           |
|              |                        | 0.1                                | 0.9 | 0   |                                         |                           |
|              |                        | 0.2                                | 0.3 | 0.5 |                                         |                           |
|              |                        | 0.2                                | 0.4 | 0.4 |                                         |                           |
|              |                        | 0.2                                | 0.5 | 0.3 |                                         |                           |
|              |                        | 0.2                                | 0.6 | 0.2 |                                         |                           |
|              |                        | 0.2                                | 0.7 | 0.1 |                                         |                           |
|              |                        | 0.2                                | 0.8 | 0   |                                         |                           |
| 0.5          | 0                      | 0.5                                |     |     |                                         |                           |
| 4            |                        | 0                                  | 0.5 | 0.5 | 85.14%                                  |                           |
|              |                        | 0                                  | 0.6 | 0.4 |                                         |                           |
|              |                        | 0                                  | 0.7 | 0.3 |                                         |                           |
|              |                        | 0                                  | 0.8 | 0.2 |                                         |                           |
|              |                        | 0                                  | 0.9 | 0.1 |                                         |                           |
|              |                        | 0                                  | 1   | 0   |                                         |                           |
|              |                        | 0.1                                | 0.4 | 0.5 |                                         |                           |
|              |                        | 0.1                                | 0.5 | 0.4 |                                         |                           |

|   |               |     |     |     |        |        |
|---|---------------|-----|-----|-----|--------|--------|
|   |               | 0.1 | 0.6 | 0.3 |        |        |
|   |               | 0.1 | 0.7 | 0.2 |        |        |
|   |               | 0.1 | 0.8 | 0.1 |        |        |
|   |               | 0.1 | 0.9 | 0   |        |        |
|   |               | 0.2 | 0.3 | 0.5 |        |        |
|   |               | 0.2 | 0.4 | 0.4 |        |        |
|   |               | 0.2 | 0.5 | 0.3 |        |        |
|   |               | 0.2 | 0.6 | 0.2 |        |        |
|   |               | 0.2 | 0.7 | 0.1 |        |        |
|   |               | 0.2 | 0.8 | 0   |        |        |
|   |               | 0.5 | 0   | 0.5 |        |        |
| 5 |               | 0   | 0.5 | 0.5 | 83.78% |        |
|   |               | 0   | 0.6 | 0.4 |        |        |
|   |               | 0   | 0.7 | 0.3 |        |        |
|   |               | 0   | 0.8 | 0.2 |        |        |
|   |               | 0   | 0.9 | 0.1 |        |        |
|   |               | 0   | 1   | 0   |        |        |
|   |               | 0.1 | 0.5 | 0.4 |        |        |
|   |               | 0.1 | 0.6 | 0.3 |        |        |
|   |               | 0.1 | 0.7 | 0.2 |        |        |
|   |               | 0.1 | 0.8 | 0.1 |        |        |
|   |               | 0.1 | 0.9 | 0   |        |        |
|   |               | 0.2 | 0.5 | 0.3 |        |        |
|   |               | 0.2 | 0.6 | 0.2 |        |        |
|   |               | 0.2 | 0.7 | 0.1 |        |        |
|   |               | 0.2 | 0.8 | 0   |        |        |
| 6 | Kennard-Stone | 0   | 0.5 | 0.5 | 88.24% | 2.3424 |
|   |               | 0   | 0.6 | 0.4 |        |        |
|   |               | 0   | 0.7 | 0.3 |        |        |
|   |               | 0   | 0.8 | 0.2 |        |        |
|   |               | 0   | 0.9 | 0.1 |        |        |
|   |               | 0   | 1   | 0   |        |        |
|   |               | 0.1 | 0.4 | 0.5 |        |        |
|   |               | 0.1 | 0.5 | 0.4 |        |        |
|   |               | 0.1 | 0.6 | 0.3 |        |        |
|   |               | 0.1 | 0.7 | 0.2 |        |        |
|   |               | 0.1 | 0.8 | 0.1 |        |        |
|   |               | 0.1 | 0.9 | 0   |        |        |
|   |               | 0.2 | 0.3 | 0.5 |        |        |
|   |               | 0.2 | 0.4 | 0.4 |        |        |
|   |               | 0.2 | 0.5 | 0.3 |        |        |
|   |               | 0.2 | 0.6 | 0.2 |        |        |

|    |     |     |     |     |        |
|----|-----|-----|-----|-----|--------|
|    |     | 0.2 | 0.7 | 0.1 |        |
|    |     | 0.2 | 0.8 | 0   |        |
| 7  |     | 0   | 0.5 | 0.5 | 85.29% |
| 8  |     | 0   | 0.5 | 0.5 | 91.17% |
|    |     | 0   | 0.6 | 0.4 |        |
|    |     | 0   | 0.7 | 0.3 |        |
|    |     | 0   | 0.8 | 0.2 |        |
|    |     | 0   | 0.9 | 0.1 |        |
|    |     | 0   | 1   | 0   |        |
|    |     | 0.1 | 0.4 | 0.5 |        |
|    |     | 0.1 | 0.5 | 0.4 |        |
|    |     | 0.1 | 0.6 | 0.3 |        |
|    |     | 0.1 | 0.7 | 0.2 |        |
|    |     | 0.1 | 0.8 | 0.1 |        |
|    |     | 0.1 | 0.9 | 0   |        |
|    |     | 0.2 | 0.3 | 0.5 |        |
|    |     | 0.2 | 0.4 | 0.4 |        |
|    |     | 0.2 | 0.5 | 0.3 |        |
|    |     | 0.2 | 0.6 | 0.2 |        |
|    | 0.2 | 0.7 | 0.1 |     |        |
|    | 0.2 | 0.8 | 0   |     |        |
| 9  |     | 0   | 0.5 | 0.5 | 89.71% |
|    |     | 0   | 0.6 | 0.4 |        |
|    |     | 0   | 0.7 | 0.3 |        |
|    |     | 0   | 0.8 | 0.2 |        |
|    |     | 0   | 0.9 | 0.1 |        |
|    |     | 0   | 1   | 0   |        |
|    |     | 0.1 | 0.4 | 0.5 |        |
|    |     | 0.1 | 0.5 | 0.4 |        |
|    |     | 0.1 | 0.6 | 0.3 |        |
|    |     | 0.1 | 0.7 | 0.2 |        |
|    |     | 0.1 | 0.8 | 0.1 |        |
|    |     | 0.1 | 0.9 | 0   |        |
|    |     | 0.2 | 0.3 | 0.5 |        |
|    |     | 0.2 | 0.4 | 0.4 |        |
|    |     | 0.2 | 0.5 | 0.3 |        |
|    |     | 0.2 | 0.6 | 0.2 |        |
|    | 0.2 | 0.7 | 0.1 |     |        |
|    | 0.2 | 0.8 | 0   |     |        |
| 10 |     | 0.3 | 0.2 | 0.5 | 89.10% |
|    |     | 0.3 | 0.3 | 0.4 |        |
|    |     | 0.3 | 0.4 | 0.3 |        |
|    |     | 0.3 | 0.5 | 0.2 |        |

|    |                    |     |     |     |        |        |
|----|--------------------|-----|-----|-----|--------|--------|
|    |                    | 0.3 | 0.6 | 0.1 |        |        |
|    |                    | 0.3 | 0.7 | 0   |        |        |
|    |                    | 0.4 | 0.1 | 0.5 |        |        |
|    |                    | 0.4 | 0.2 | 0.4 |        |        |
|    |                    | 0.4 | 0.3 | 0.3 |        |        |
|    |                    | 0.4 | 0.4 | 0.2 |        |        |
|    |                    | 0.4 | 0.5 | 0.1 |        |        |
|    |                    | 0.4 | 0.6 | 0   |        |        |
|    |                    | 0.5 | 0   | 0.5 |        |        |
|    |                    | 0.5 | 0.1 | 0.4 |        |        |
|    |                    | 0.5 | 0.2 | 0.3 |        |        |
|    |                    | 0.5 | 0.3 | 0.2 |        |        |
|    |                    | 0.5 | 0.4 | 0.1 |        |        |
|    |                    | 0.5 | 0.5 | 0   |        |        |
| 11 | Modified-k-medoids | 0   | 0.5 | 0.5 | 89.33% | 2.3968 |
|    |                    | 0   | 0.6 | 0.4 |        |        |
|    |                    | 0   | 0.7 | 0.3 |        |        |
|    |                    | 0   | 0.8 | 0.2 |        |        |
|    |                    | 0   | 0.9 | 0.1 |        |        |
|    |                    | 0   | 1   | 0   |        |        |
|    |                    | 0.1 | 0.4 | 0.5 |        |        |
|    |                    | 0.1 | 0.5 | 0.4 |        |        |
|    |                    | 0.1 | 0.6 | 0.3 |        |        |
|    |                    | 0.1 | 0.7 | 0.2 |        |        |
|    |                    | 0.1 | 0.8 | 0.1 |        |        |
|    |                    | 0.1 | 0.9 | 0   |        |        |
|    |                    | 0.2 | 0.3 | 0.5 |        |        |
|    |                    | 0.2 | 0.4 | 0.4 |        |        |
|    |                    | 0.2 | 0.5 | 0.3 |        |        |
|    |                    | 0.2 | 0.6 | 0.2 |        |        |
|    |                    | 0.2 | 0.7 | 0.1 |        |        |
|    |                    | 0.2 | 0.8 | 0   |        |        |
| 12 |                    | 0.3 | 0.2 | 0.5 | 89.33% |        |
|    |                    | 0.4 | 0.1 | 0.5 |        |        |
|    |                    | 0.4 | 0.2 | 0.4 |        |        |
|    |                    | 0.5 | 0   | 0.5 |        |        |
|    |                    | 0.5 | 0.1 | 0.4 |        |        |
|    |                    | 0.5 | 0.2 | 0.3 |        |        |
| 13 |                    | 0   | 0.5 | 0.5 | 88%    |        |
|    |                    | 0   | 0.6 | 0.4 |        |        |
|    |                    | 0   | 0.7 | 0.3 |        |        |
|    |                    | 0   | 0.8 | 0.2 |        |        |

|    |  |     |     |     |     |
|----|--|-----|-----|-----|-----|
|    |  | 0   | 0.9 | 0.1 |     |
|    |  | 0   | 1   | 0   |     |
|    |  | 0.1 | 0.4 | 0.5 |     |
|    |  | 0.1 | 0.5 | 0.4 |     |
|    |  | 0.1 | 0.6 | 0.3 |     |
|    |  | 0.1 | 0.7 | 0.2 |     |
|    |  | 0.1 | 0.8 | 0.1 |     |
|    |  | 0.1 | 0.9 | 0   |     |
|    |  | 0.2 | 0.3 | 0.5 |     |
|    |  | 0.2 | 0.4 | 0.4 |     |
|    |  | 0.2 | 0.5 | 0.3 |     |
|    |  | 0.2 | 0.6 | 0.2 |     |
|    |  | 0.2 | 0.7 | 0.1 |     |
|    |  | 0.2 | 0.8 | 0   |     |
|    |  | 0.3 | 0.2 | 0.5 |     |
|    |  | 0.3 | 0.3 | 0.4 |     |
|    |  | 0.3 | 0.4 | 0.3 |     |
|    |  | 0.3 | 0.5 | 0.2 |     |
|    |  | 0.3 | 0.6 | 0.1 |     |
|    |  | 0.3 | 0.7 | 0   |     |
|    |  | 0.4 | 0.1 | 0.5 |     |
|    |  | 0.4 | 0.2 | 0.4 |     |
|    |  | 0.4 | 0.3 | 0.3 |     |
|    |  | 0.4 | 0.4 | 0.2 |     |
|    |  | 0.4 | 0.5 | 0.1 |     |
|    |  | 0.4 | 0.6 | 0   |     |
|    |  | 0.5 | 0   | 0.5 |     |
|    |  | 0.5 | 0.1 | 0.4 |     |
|    |  | 0.5 | 0.2 | 0.3 |     |
|    |  | 0.5 | 0.3 | 0.2 |     |
|    |  | 0.5 | 0.4 | 0.1 |     |
|    |  | 0.5 | 0.5 | 0   |     |
| 14 |  | 0.3 | 0.2 | 0.5 | 92% |
|    |  | 0.3 | 0.3 | 0.4 |     |
|    |  | 0.3 | 0.4 | 0.3 |     |
|    |  | 0.3 | 0.5 | 0.2 |     |
|    |  | 0.3 | 0.6 | 0.1 |     |
|    |  | 0.3 | 0.7 | 0   |     |
|    |  | 0.4 | 0.1 | 0.5 |     |
|    |  | 0.4 | 0.2 | 0.4 |     |
|    |  | 0.4 | 0.3 | 0.3 |     |
|    |  | 0.4 | 0.4 | 0.2 |     |
|    |  | 0.4 | 0.5 | 0.1 |     |

|    |  |     |     |     |     |
|----|--|-----|-----|-----|-----|
|    |  | 0.4 | 0.6 | 0   |     |
|    |  | 0.5 | 0   | 0.5 |     |
|    |  | 0.5 | 0.1 | 0.4 |     |
|    |  | 0.5 | 0.2 | 0.3 |     |
|    |  | 0.5 | 0.3 | 0.2 |     |
|    |  | 0.5 | 0.4 | 0.1 |     |
|    |  | 0.5 | 0.5 | 0   |     |
| 15 |  | 0   | 0.5 | 0.5 | 88% |
|    |  | 0   | 0.6 | 0.4 |     |
|    |  | 0   | 0.7 | 0.3 |     |
|    |  | 0   | 0.8 | 0.2 |     |
|    |  | 0   | 0.9 | 0.1 |     |
|    |  | 0   | 1   | 0   |     |
|    |  | 0.1 | 0.4 | 0.5 |     |
|    |  | 0.1 | 0.5 | 0.4 |     |
|    |  | 0.1 | 0.6 | 0.3 |     |
|    |  | 0.1 | 0.7 | 0.2 |     |
|    |  | 0.1 | 0.8 | 0.1 |     |
|    |  | 0.1 | 0.9 | 0   |     |
|    |  | 0.2 | 0.3 | 0.5 |     |
|    |  | 0.2 | 0.4 | 0.4 |     |
|    |  | 0.2 | 0.5 | 0.3 |     |
|    |  | 0.2 | 0.6 | 0.2 |     |
|    |  | 0.2 | 0.7 | 0.1 |     |
|    |  | 0.2 | 0.8 | 0   |     |
|    |  | 0.3 | 0.2 | 0.5 |     |
|    |  | 0.3 | 0.3 | 0.4 |     |
|    |  | 0.3 | 0.4 | 0.3 |     |
|    |  | 0.3 | 0.5 | 0.2 |     |
|    |  | 0.3 | 0.6 | 0.1 |     |
|    |  | 0.3 | 0.7 | 0   |     |
|    |  | 0.4 | 0.1 | 0.5 |     |
|    |  | 0.4 | 0.2 | 0.4 |     |
|    |  | 0.4 | 0.3 | 0.3 |     |
|    |  | 0.4 | 0.4 | 0.2 |     |
|    |  | 0.4 | 0.5 | 0.1 |     |
|    |  | 0.4 | 0.6 | 0   |     |
|    |  | 0.5 | 0   | 0.5 |     |
|    |  | 0.5 | 0.1 | 0.4 |     |
|    |  | 0.5 | 0.2 | 0.3 |     |
|    |  | 0.5 | 0.3 | 0.2 |     |
|    |  | 0.5 | 0.4 | 0.1 |     |
|    |  | 0.5 | 0.5 | 0   |     |

**Table S2** Automated weighting analysis for AChE data set (Model Dataset 2).

| Model | Division method | Best weighting combinations |     |        | % Correct predictions (Test set) | Training set range |        |
|-------|-----------------|-----------------------------|-----|--------|----------------------------------|--------------------|--------|
| 1     | Sorted response | 0.5                         | 0   | 0.5    | 87.32%                           | 7.8195             |        |
| 2     |                 | 0.5                         | 0   | 0.5    | 85.92%                           |                    |        |
| 3     |                 | 0                           | 0.1 | 0.9    | 86.62%                           |                    |        |
|       |                 | 0                           | 0.2 | 0.8    |                                  |                    |        |
|       |                 | 0.1                         | 0   | 0.9    |                                  |                    |        |
|       |                 | 0.1                         | 0.1 | 0.8    |                                  |                    |        |
|       |                 | 0.2                         | 0   | 0.8    |                                  |                    |        |
|       |                 | 0.2                         | 0.1 | 0.7    |                                  |                    |        |
|       |                 | 0.3                         | 0   | 0.7    |                                  |                    |        |
|       |                 | 0.3                         | 0.1 | 0.6    |                                  |                    |        |
| 4     |                 | 0.4                         | 0   | 0.6    | 88.03%                           |                    |        |
|       |                 | 0.5                         | 0   | 0.5    |                                  |                    |        |
|       |                 | 0                           | 0.1 | 0.9    |                                  |                    |        |
|       | 0               | 0.2                         | 0.8 |        |                                  |                    |        |
|       | 0.1             | 0                           | 0.9 |        |                                  |                    |        |
| 5     | 0.1             | 0.1                         | 0.8 | 86.62% |                                  |                    |        |
|       | 0.2             | 0                           | 0.8 |        |                                  |                    |        |
|       | 0.2             | 0.1                         | 0.7 |        |                                  |                    |        |
|       | 0.5             | 0                           | 0.5 |        |                                  |                    |        |
|       | 0               | 0.1                         | 0.9 |        |                                  |                    |        |
|       | 0               | 0.2                         | 0.8 |        |                                  |                    |        |
| 6     | Kennard-Stone   | 0.1                         | 0   | 0.9    | 84.38%                           |                    |        |
|       |                 | 0.1                         | 0.1 | 0.8    |                                  |                    |        |
|       |                 | 0.2                         | 0   | 0.8    |                                  |                    |        |
|       |                 | 0.2                         | 0.1 | 0.7    |                                  |                    |        |
|       |                 | 0.3                         | 0   | 0.7    |                                  |                    |        |
|       |                 | 0.3                         | 0.1 | 0.6    |                                  |                    |        |
|       |                 | 0.4                         | 0   | 0.6    |                                  |                    |        |
|       |                 | 0.5                         | 0   | 0.5    |                                  |                    |        |
|       |                 | 7                           | 0   | 0.1    |                                  | 0.9                | 91.41% |
|       |                 |                             | 0   | 0.2    |                                  | 0.8                |        |
| 0.1   | 0               |                             | 0.9 |        |                                  |                    |        |
| 0.1   | 0.1             |                             | 0.8 |        |                                  |                    |        |

|    |  |     |     |     |        |
|----|--|-----|-----|-----|--------|
|    |  | 0.2 | 0   | 0.8 |        |
|    |  | 0.2 | 0.1 | 0.7 |        |
|    |  | 0.3 | 0   | 0.7 |        |
|    |  | 0.3 | 0.1 | 0.6 |        |
|    |  | 0.4 | 0   | 0.6 |        |
|    |  | 0.5 | 0   | 0.5 |        |
| 8  |  | 0   | 0.1 | 0.9 | 91.41% |
|    |  | 0   | 0.2 | 0.8 |        |
|    |  | 0.1 | 0   | 0.9 |        |
|    |  | 0.1 | 0.1 | 0.8 |        |
|    |  | 0.2 | 0   | 0.8 |        |
|    |  | 0.2 | 0.1 | 0.7 |        |
|    |  | 0.3 | 0   | 0.7 |        |
|    |  | 0.3 | 0.1 | 0.6 |        |
|    |  | 0.4 | 0   | 0.6 |        |
|    |  | 0.5 | 0   | 0.5 |        |
| 9  |  | 0   | 0.1 | 0.9 | 86.72% |
|    |  | 0   | 0.2 | 0.8 |        |
|    |  | 0.1 | 0   | 0.9 |        |
|    |  | 0.1 | 0.1 | 0.8 |        |
|    |  | 0.2 | 0   | 0.8 |        |
|    |  | 0.2 | 0.1 | 0.7 |        |
| 10 |  | 0   | 0.1 | 0.9 | 88.28% |
|    |  | 0   | 0.2 | 0.8 |        |
|    |  | 0   | 0.3 | 0.7 |        |
|    |  | 0   | 0.4 | 0.6 |        |
|    |  | 0   | 0.5 | 0.5 |        |
|    |  | 0.1 | 0   | 0.9 |        |
|    |  | 0.1 | 0.1 | 0.8 |        |
|    |  | 0.1 | 0.2 | 0.7 |        |
|    |  | 0.1 | 0.3 | 0.6 |        |
|    |  | 0.1 | 0.4 | 0.5 |        |
|    |  | 0.2 | 0   | 0.8 |        |
|    |  | 0.2 | 0.1 | 0.7 |        |
|    |  | 0.2 | 0.2 | 0.6 |        |
|    |  | 0.2 | 0.3 | 0.5 |        |
|    |  | 0.3 | 0   | 0.7 |        |
|    |  | 0.3 | 0.1 | 0.6 |        |
|    |  | 0.3 | 0.2 | 0.5 |        |
|    |  | 0.4 | 0   | 0.6 |        |
|    |  | 0.4 | 0.1 | 0.5 |        |
|    |  | 0.5 | 0   | 0.5 |        |

|    |                    |     |     |     |        |        |
|----|--------------------|-----|-----|-----|--------|--------|
| 11 | Modified-k-medoids | 0   | 0.1 | 0.9 | 86.62% | 7.7558 |
|    |                    | 0   | 0.2 | 0.8 |        |        |
|    |                    | 0.1 | 0   | 0.9 |        |        |
|    |                    | 0.1 | 0.1 | 0.8 |        |        |
|    |                    | 0.2 | 0   | 0.8 |        |        |
|    |                    | 0.2 | 0.1 | 0.7 |        |        |
|    |                    | 0.3 | 0   | 0.7 |        |        |
|    |                    | 0.3 | 0.1 | 0.6 |        |        |
|    |                    | 0.4 | 0   | 0.6 |        |        |
|    |                    | 0.5 | 0   | 0.5 |        |        |
| 12 |                    | 0.5 | 0   | 0.5 | 87.32% |        |
| 13 |                    | 0.5 | 0   | 0.5 | 85.92% |        |
| 14 |                    | 0.5 | 0   | 0.5 | 85.21% |        |
| 15 |                    | 0.5 | 0   | 0.5 | 87.32% |        |

**Table S3** Automated weighting analysis for C60 solubility in organic solvents data set (Model Dataset 3).

| Model | Division method | Best weighting combinations |     |     | % Correct predictions (Test set) | Training set range |
|-------|-----------------|-----------------------------|-----|-----|----------------------------------|--------------------|
| 1     | Sorted response | 0.3                         | 0.2 | 0.5 | 97.87%                           | 6.97               |
|       |                 | 0.4                         | 0.1 | 0.5 |                                  |                    |
|       |                 | 0.4                         | 0.2 | 0.4 |                                  |                    |
|       |                 | 0.5                         | 0   | 0.5 |                                  |                    |
|       |                 | 0.5                         | 0.1 | 0.4 |                                  |                    |
|       |                 | 0.5                         | 0.2 | 0.3 |                                  |                    |
| 2     |                 | 0.5                         | 0   | 0.5 | 95.75%                           |                    |
| 3     |                 | 0                           | 0.5 | 0.5 | 93.62%                           |                    |
|       |                 | 0                           | 0.6 | 0.4 |                                  |                    |
|       |                 | 0                           | 0.7 | 0.3 |                                  |                    |
|       |                 | 0.1                         | 0.4 | 0.5 |                                  |                    |
|       |                 | 0.1                         | 0.5 | 0.4 |                                  |                    |
|       |                 | 0.1                         | 0.6 | 0.3 |                                  |                    |
|       |                 | 0.1                         | 0.7 | 0.2 |                                  |                    |
|       |                 | 0.2                         | 0.3 | 0.5 |                                  |                    |
|       |                 | 0.2                         | 0.4 | 0.4 |                                  |                    |
|       |                 | 0.2                         | 0.5 | 0.3 |                                  |                    |
|       |                 | 0.2                         | 0.6 | 0.2 |                                  |                    |
|       |                 | 0.3                         | 0.2 | 0.5 |                                  |                    |
|       |                 | 0.3                         | 0.3 | 0.4 |                                  |                    |
|       |                 | 0.3                         | 0.4 | 0.3 |                                  |                    |
|       |                 | 0.3                         | 0.5 | 0.2 |                                  |                    |
|       |                 | 0.3                         | 0.6 | 0.1 |                                  |                    |
|       |                 | 0.4                         | 0.1 | 0.5 |                                  |                    |
|       |                 | 0.4                         | 0.2 | 0.4 |                                  |                    |
|       |                 | 0.4                         | 0.3 | 0.3 |                                  |                    |
|       |                 | 0.4                         | 0.4 | 0.2 |                                  |                    |
|       |                 | 0.4                         | 0.5 | 0.1 |                                  |                    |
|       |                 | 0.5                         | 0.1 | 0.4 |                                  |                    |
|       |                 | 0.5                         | 0.2 | 0.3 |                                  |                    |
|       |                 | 0.5                         | 0.3 | 0.2 |                                  |                    |
|       |                 | 0.5                         | 0.4 | 0.1 |                                  |                    |
|       |                 | 0.5                         | 0.5 | 0   |                                  |                    |
| 4     |                 | 0.3                         | 0.2 | 0.5 | 95.74%                           |                    |
|       |                 | 0.4                         | 0.1 | 0.5 |                                  |                    |
|       |                 | 0.4                         | 0.2 | 0.4 |                                  |                    |
|       |                 | 0.5                         | 0   | 0.5 |                                  |                    |
|       |                 | 0.5                         | 0.1 | 0.4 |                                  |                    |

|   |               |     |     |     |        |      |
|---|---------------|-----|-----|-----|--------|------|
|   |               | 0.5 | 0.2 | 0.3 |        |      |
| 5 |               | 0.3 | 0.2 | 0.5 | 95.74% |      |
|   |               | 0.4 | 0.1 | 0.5 |        |      |
|   |               | 0.4 | 0.2 | 0.4 |        |      |
|   |               | 0.5 | 0   | 0.5 |        |      |
|   |               | 0.5 | 0.1 | 0.4 |        |      |
|   |               | 0.5 | 0.2 | 0.3 |        |      |
| 6 | Kennard-Stone | 0.4 | 0   | 0.6 | 100%   | 6.97 |
|   |               | 0.4 | 0.1 | 0.5 |        |      |
|   |               | 0.4 | 0.2 | 0.4 |        |      |
|   |               | 0.4 | 0.3 | 0.3 |        |      |
|   |               | 0.4 | 0.4 | 0.2 |        |      |
|   |               | 0.4 | 0.5 | 0.1 |        |      |
|   |               | 0.4 | 0.6 | 0   |        |      |
|   |               | 0.5 | 0   | 0.5 |        |      |
|   |               | 0.5 | 0.1 | 0.4 |        |      |
|   |               | 0.5 | 0.2 | 0.3 |        |      |
|   |               | 0.5 | 0.3 | 0.2 |        |      |
|   |               | 0.5 | 0.4 | 0.1 |        |      |
|   |               | 0.5 | 0.5 | 0   |        |      |
| 7 |               | 0.5 | 0   | 0.5 | 97.87% |      |
|   |               | 0.5 | 0.1 | 0.4 |        |      |
|   |               | 0.5 | 0.2 | 0.3 |        |      |
|   |               | 0.5 | 0.3 | 0.2 |        |      |
|   |               | 0.5 | 0.4 | 0.1 |        |      |
|   |               | 0.5 | 0.5 | 0   |        |      |
| 8 |               | 0.4 | 0   | 0.6 | 95.74% |      |
|   |               | 0.4 | 0.1 | 0.5 |        |      |
|   |               | 0.4 | 0.2 | 0.4 |        |      |
|   |               | 0.4 | 0.3 | 0.3 |        |      |
|   |               | 0.4 | 0.4 | 0.2 |        |      |
|   |               | 0.4 | 0.5 | 0.1 |        |      |
|   |               | 0.4 | 0.6 | 0   |        |      |
|   |               | 0.5 | 0   | 0.5 |        |      |
|   |               | 0.5 | 0.1 | 0.4 |        |      |
|   |               | 0.5 | 0.2 | 0.3 |        |      |
|   |               | 0.5 | 0.3 | 0.2 |        |      |
|   |               | 0.5 | 0.4 | 0.1 |        |      |
|   |               | 0.5 | 0.5 | 0   |        |      |
| 9 |               | 0.5 | 0   | 0.5 | 95.74% |      |
|   |               | 0.5 | 0.1 | 0.4 |        |      |
|   |               | 0.5 | 0.2 | 0.3 |        |      |

|    |                    |     |     |     |        |      |
|----|--------------------|-----|-----|-----|--------|------|
|    |                    | 0.5 | 0.3 | 0.2 |        |      |
|    |                    | 0.5 | 0.4 | 0.1 |        |      |
|    |                    | 0.5 | 0.5 | 0   |        |      |
| 10 |                    | 0.5 | 0   | 0.5 | 95.74% |      |
|    |                    | 0.5 | 0.1 | 0.4 |        |      |
|    |                    | 0.5 | 0.2 | 0.3 |        |      |
|    |                    | 0.5 | 0.3 | 0.2 |        |      |
|    |                    | 0.5 | 0.4 | 0.1 |        |      |
|    |                    | 0.5 | 0.5 | 0   |        |      |
| 11 | Modified-k-medoids | 0   | 0.5 | 0.5 | 95.74% | 6.97 |
|    |                    | 0   | 0.6 | 0.4 |        |      |
|    |                    | 0   | 0.7 | 0.3 |        |      |
|    |                    | 0   | 0.8 | 0.2 |        |      |
|    |                    | 0   | 0.9 | 0.1 |        |      |
|    |                    | 0   | 1   | 0   |        |      |
|    |                    | 0.1 | 0.5 | 0.4 |        |      |
|    |                    | 0.1 | 0.6 | 0.3 |        |      |
|    |                    | 0.1 | 0.7 | 0.2 |        |      |
|    |                    | 0.1 | 0.8 | 0.1 |        |      |
|    |                    | 0.1 | 0.9 | 0   |        |      |
|    |                    | 0.2 | 0.5 | 0.3 |        |      |
|    |                    | 0.2 | 0.6 | 0.2 |        |      |
|    |                    | 0.2 | 0.7 | 0.1 |        |      |
|    |                    | 0.2 | 0.8 | 0   |        |      |
|    |                    | 0.3 | 0.5 | 0.2 |        |      |
|    |                    | 0.3 | 0.6 | 0.1 |        |      |
|    |                    | 0.3 | 0.7 | 0   |        |      |
|    |                    | 0.4 | 0.5 | 0.1 |        |      |
|    |                    | 0.4 | 0.6 | 0   |        |      |
|    |                    | 0.5 | 0.5 | 0   |        |      |
| 12 |                    | 0   | 0.1 | 0.9 | 93.62% |      |
|    |                    | 0   | 0.2 | 0.8 |        |      |
|    |                    | 0.1 | 0   | 0.9 |        |      |
|    |                    | 0.1 | 0.1 | 0.8 |        |      |
|    |                    | 0.1 | 0.2 | 0.7 |        |      |
|    |                    | 0.2 | 0   | 0.8 |        |      |
|    |                    | 0.2 | 0.1 | 0.7 |        |      |
|    |                    | 0.2 | 0.2 | 0.6 |        |      |
|    |                    | 0.3 | 0.1 | 0.6 |        |      |
|    |                    | 0.3 | 0.2 | 0.5 |        |      |
|    |                    | 0.4 | 0.1 | 0.5 |        |      |
|    |                    | 0.4 | 0.2 | 0.4 |        |      |

|    |  |     |     |     |        |
|----|--|-----|-----|-----|--------|
|    |  | 0.5 | 0   | 0.5 |        |
|    |  | 0.5 | 0.1 | 0.4 |        |
|    |  | 0.5 | 0.2 | 0.3 |        |
| 13 |  | 0   | 0.5 | 0.5 | 91.49% |
|    |  | 0   | 0.6 | 0.4 |        |
|    |  | 0   | 0.7 | 0.3 |        |
|    |  | 0   | 0.8 | 0.2 |        |
|    |  | 0   | 0.9 | 0.1 |        |
|    |  | 0   | 1   | 0   |        |
|    |  | 0.1 | 0.5 | 0.4 |        |
|    |  | 0.1 | 0.6 | 0.3 |        |
|    |  | 0.1 | 0.7 | 0.2 |        |
|    |  | 0.1 | 0.8 | 0.1 |        |
|    |  | 0.1 | 0.9 | 0   |        |
|    |  | 0.2 | 0.5 | 0.3 |        |
|    |  | 0.2 | 0.6 | 0.2 |        |
|    |  | 0.2 | 0.7 | 0.1 |        |
|    |  | 0.2 | 0.8 | 0   |        |
|    |  | 0.3 | 0.5 | 0.2 |        |
|    |  | 0.3 | 0.6 | 0.1 |        |
|    |  | 0.3 | 0.7 | 0   |        |
|    |  | 0.4 | 0.5 | 0.1 |        |
|    |  | 0.4 | 0.6 | 0   |        |
|    |  | 0.5 | 0.5 | 0   |        |
| 14 |  | 0.5 | 0   | 0.5 | 95.74% |
| 15 |  | 0   | 0.5 | 0.5 | 91.49% |
|    |  | 0   | 0.6 | 0.4 |        |
|    |  | 0   | 0.7 | 0.3 |        |
|    |  | 0   | 0.8 | 0.2 |        |
|    |  | 0   | 0.9 | 0.1 |        |
|    |  | 0   | 1   | 0   |        |
|    |  | 0.1 | 0.5 | 0.4 |        |
|    |  | 0.1 | 0.6 | 0.3 |        |
|    |  | 0.1 | 0.7 | 0.2 |        |
|    |  | 0.1 | 0.8 | 0.1 |        |
|    |  | 0.1 | 0.9 | 0   |        |
|    |  | 0.2 | 0.8 | 0   |        |
|    |  | 0.3 | 0.5 | 0.2 |        |
|    |  | 0.3 | 0.6 | 0.1 |        |
|    |  | 0.3 | 0.7 | 0   |        |
|    |  | 0.4 | 0.5 | 0.1 |        |
|    |  | 0.4 | 0.6 | 0   |        |

|  |  |     |     |   |  |  |
|--|--|-----|-----|---|--|--|
|  |  | 0.5 | 0.5 | 0 |  |  |
|--|--|-----|-----|---|--|--|

**Table S4** Automated weighting analysis for bioluminescent repression of the bacterium genus *Pseudomonas* data set (Model Dataset 4)

| <b>Model</b> | <b>Division method</b> | <b>Best weighting combinations</b> |     |     | <b>% Correct predictions (Test set)</b> | <b>Training set range</b> |
|--------------|------------------------|------------------------------------|-----|-----|-----------------------------------------|---------------------------|
| 1            | Sorted response        | 0                                  | 0.1 | 0.9 | 80.65%                                  | 4.0604                    |
|              |                        | 0                                  | 0.2 | 0.8 |                                         |                           |
|              |                        | 0                                  | 0.3 | 0.7 |                                         |                           |
|              |                        | 0                                  | 0.4 | 0.6 |                                         |                           |
|              |                        | 0                                  | 0.5 | 0.5 |                                         |                           |
|              |                        | 0                                  | 0.6 | 0.4 |                                         |                           |
|              |                        | 0                                  | 0.7 | 0.3 |                                         |                           |
|              |                        | 0                                  | 0.8 | 0.2 |                                         |                           |
|              |                        | 0                                  | 0.9 | 0.1 |                                         |                           |
|              |                        | 0                                  | 1   | 0   |                                         |                           |
|              |                        | 0.1                                | 0   | 0.9 |                                         |                           |
|              |                        | 0.1                                | 0.1 | 0.8 |                                         |                           |
|              |                        | 0.1                                | 0.2 | 0.7 |                                         |                           |
|              |                        | 0.1                                | 0.3 | 0.6 |                                         |                           |
|              |                        | 0.1                                | 0.4 | 0.5 |                                         |                           |
|              |                        | 0.1                                | 0.5 | 0.4 |                                         |                           |
|              |                        | 0.1                                | 0.6 | 0.3 |                                         |                           |
|              |                        | 0.1                                | 0.7 | 0.2 |                                         |                           |
|              |                        | 0.1                                | 0.8 | 0.1 |                                         |                           |
|              |                        | 0.1                                | 0.9 | 0   |                                         |                           |
|              |                        | 0.2                                | 0   | 0.8 |                                         |                           |
|              |                        | 0.2                                | 0.1 | 0.7 |                                         |                           |
|              |                        | 0.2                                | 0.2 | 0.6 |                                         |                           |
|              |                        | 0.2                                | 0.3 | 0.5 |                                         |                           |
|              |                        | 0.2                                | 0.4 | 0.4 |                                         |                           |
|              |                        | 0.2                                | 0.5 | 0.3 |                                         |                           |
|              |                        | 0.2                                | 0.6 | 0.2 |                                         |                           |
|              |                        | 0.2                                | 0.7 | 0.1 |                                         |                           |
|              |                        | 0.2                                | 0.8 | 0   |                                         |                           |
|              |                        | 0.3                                | 0   | 0.7 |                                         |                           |
| 0.3          | 0.1                    | 0.6                                |     |     |                                         |                           |
| 0.3          | 0.2                    | 0.5                                |     |     |                                         |                           |
| 0.3          | 0.3                    | 0.4                                |     |     |                                         |                           |
| 0.3          | 0.4                    | 0.3                                |     |     |                                         |                           |
| 0.3          | 0.5                    | 0.2                                |     |     |                                         |                           |

|   |  |     |     |     |        |
|---|--|-----|-----|-----|--------|
|   |  | 0.3 | 0.6 | 0.1 |        |
|   |  | 0.3 | 0.7 | 0   |        |
|   |  | 0.4 | 0   | 0.6 |        |
|   |  | 0.4 | 0.1 | 0.5 |        |
|   |  | 0.4 | 0.2 | 0.4 |        |
|   |  | 0.4 | 0.3 | 0.3 |        |
|   |  | 0.4 | 0.4 | 0.2 |        |
|   |  | 0.4 | 0.5 | 0.1 |        |
|   |  | 0.4 | 0.6 | 0   |        |
|   |  | 0.5 | 0   | 0.5 |        |
|   |  | 0.5 | 0.1 | 0.4 |        |
|   |  | 0.5 | 0.2 | 0.3 |        |
|   |  | 0.5 | 0.3 | 0.2 |        |
|   |  | 0.5 | 0.4 | 0.1 |        |
|   |  | 0.5 | 0.5 | 0   |        |
| 2 |  | 0   | 0.1 | 0.9 | 80.65% |
|   |  | 0   | 0.2 | 0.8 |        |
|   |  | 0   | 0.6 | 0.4 |        |
|   |  | 0   | 0.7 | 0.3 |        |
|   |  | 0   | 0.8 | 0.2 |        |
|   |  | 0   | 0.9 | 0.1 |        |
|   |  | 0   | 1   | 0   |        |
|   |  | 0.1 | 0   | 0.9 |        |
|   |  | 0.1 | 0.1 | 0.8 |        |
|   |  | 0.1 | 0.6 | 0.3 |        |
|   |  | 0.1 | 0.7 | 0.2 |        |
|   |  | 0.1 | 0.8 | 0.1 |        |
|   |  | 0.1 | 0.9 | 0   |        |
|   |  | 0.2 | 0   | 0.8 |        |
|   |  | 0.2 | 0.1 | 0.7 |        |
|   |  | 0.2 | 0.6 | 0.2 |        |
|   |  | 0.2 | 0.7 | 0.1 |        |
|   |  | 0.2 | 0.8 | 0   |        |
|   |  | 0.3 | 0   | 0.7 |        |
|   |  | 0.3 | 0.1 | 0.6 |        |
|   |  | 0.3 | 0.6 | 0.1 |        |
|   |  | 0.3 | 0.7 | 0   |        |
|   |  | 0.4 | 0   | 0.6 |        |
|   |  | 0.4 | 0.6 | 0   |        |
|   |  | 0.5 | 0   | 0.5 |        |
| 3 |  | 0   | 0.1 | 0.9 | 87.10% |
|   |  | 0   | 0.2 | 0.8 |        |
|   |  | 0   | 0.3 | 0.7 |        |

|   |  |     |     |     |        |
|---|--|-----|-----|-----|--------|
|   |  | 0   | 0.4 | 0.6 |        |
|   |  | 0   | 0.8 | 0.2 |        |
|   |  | 0   | 0.9 | 0.1 |        |
|   |  | 0   | 1   | 0   |        |
|   |  | 0.1 | 0   | 0.9 |        |
|   |  | 0.1 | 0.1 | 0.8 |        |
|   |  | 0.1 | 0.2 | 0.7 |        |
|   |  | 0.1 | 0.3 | 0.6 |        |
|   |  | 0.1 | 0.4 | 0.5 |        |
|   |  | 0.1 | 0.8 | 0.1 |        |
|   |  | 0.1 | 0.9 | 0   |        |
|   |  | 0.2 | 0   | 0.8 |        |
|   |  | 0.2 | 0.1 | 0.7 |        |
|   |  | 0.2 | 0.2 | 0.6 |        |
|   |  | 0.2 | 0.3 | 0.5 |        |
|   |  | 0.2 | 0.4 | 0.4 |        |
|   |  | 0.2 | 0.7 | 0.1 |        |
|   |  | 0.2 | 0.8 | 0   |        |
|   |  | 0.3 | 0   | 0.7 |        |
|   |  | 0.3 | 0.1 | 0.6 |        |
|   |  | 0.3 | 0.2 | 0.5 |        |
|   |  | 0.3 | 0.3 | 0.4 |        |
|   |  | 0.3 | 0.4 | 0.3 |        |
|   |  | 0.3 | 0.7 | 0   |        |
|   |  | 0.4 | 0   | 0.6 |        |
|   |  | 0.4 | 0.1 | 0.5 |        |
|   |  | 0.4 | 0.2 | 0.4 |        |
|   |  | 0.4 | 0.3 | 0.3 |        |
|   |  | 0.4 | 0.4 | 0.2 |        |
|   |  | 0.4 | 0.6 | 0   |        |
|   |  | 0.5 | 0   | 0.5 |        |
|   |  | 0.5 | 0.1 | 0.4 |        |
|   |  | 0.5 | 0.2 | 0.3 |        |
|   |  | 0.5 | 0.3 | 0.2 |        |
|   |  | 0.5 | 0.4 | 0.1 |        |
| 4 |  | 0   | 0.1 | 0.9 | 83.87% |
|   |  | 0   | 0.2 | 0.8 |        |
|   |  | 0   | 0.3 | 0.7 |        |
|   |  | 0   | 0.4 | 0.6 |        |
|   |  | 0   | 0.8 | 0.2 |        |
|   |  | 0   | 0.9 | 0.1 |        |
|   |  | 0   | 1   | 0   |        |
|   |  | 0.1 | 0   | 0.9 |        |

|   |  |     |     |     |        |  |
|---|--|-----|-----|-----|--------|--|
|   |  | 0.1 | 0.1 | 0.8 |        |  |
|   |  | 0.1 | 0.2 | 0.7 |        |  |
|   |  | 0.1 | 0.3 | 0.6 |        |  |
|   |  | 0.1 | 0.4 | 0.5 |        |  |
|   |  | 0.1 | 0.8 | 0.1 |        |  |
|   |  | 0.1 | 0.9 | 0   |        |  |
|   |  | 0.2 | 0   | 0.8 |        |  |
|   |  | 0.2 | 0.1 | 0.7 |        |  |
|   |  | 0.2 | 0.2 | 0.6 |        |  |
|   |  | 0.2 | 0.3 | 0.5 |        |  |
|   |  | 0.2 | 0.4 | 0.4 |        |  |
|   |  | 0.2 | 0.7 | 0.1 |        |  |
|   |  | 0.2 | 0.8 | 0   |        |  |
|   |  | 0.3 | 0   | 0.7 |        |  |
|   |  | 0.3 | 0.1 | 0.6 |        |  |
|   |  | 0.3 | 0.2 | 0.5 |        |  |
|   |  | 0.3 | 0.3 | 0.4 |        |  |
|   |  | 0.3 | 0.4 | 0.3 |        |  |
|   |  | 0.3 | 0.7 | 0   |        |  |
|   |  | 0.4 | 0   | 0.6 |        |  |
|   |  | 0.4 | 0.1 | 0.5 |        |  |
|   |  | 0.4 | 0.2 | 0.4 |        |  |
|   |  | 0.4 | 0.3 | 0.3 |        |  |
|   |  | 0.4 | 0.4 | 0.2 |        |  |
|   |  | 0.4 | 0.6 | 0   |        |  |
|   |  | 0.5 | 0   | 0.5 |        |  |
|   |  | 0.5 | 0.1 | 0.4 |        |  |
|   |  | 0.5 | 0.2 | 0.3 |        |  |
|   |  | 0.5 | 0.3 | 0.2 |        |  |
|   |  | 0.5 | 0.4 | 0.1 |        |  |
| 5 |  | 0   | 0.3 | 0.7 | 87.10% |  |
|   |  | 0   | 0.4 | 0.6 |        |  |
|   |  | 0.1 | 0.2 | 0.7 |        |  |
|   |  | 0.1 | 0.3 | 0.6 |        |  |
|   |  | 0.1 | 0.4 | 0.5 |        |  |
|   |  | 0.2 | 0.2 | 0.6 |        |  |
|   |  | 0.2 | 0.3 | 0.5 |        |  |
|   |  | 0.2 | 0.4 | 0.4 |        |  |
|   |  | 0.3 | 0.2 | 0.5 |        |  |
|   |  | 0.3 | 0.3 | 0.4 |        |  |
|   |  | 0.3 | 0.4 | 0.3 |        |  |
|   |  | 0.4 | 0.1 | 0.5 |        |  |
|   |  | 0.4 | 0.2 | 0.4 |        |  |

|   |                   |     |     |     |        |        |
|---|-------------------|-----|-----|-----|--------|--------|
|   |                   | 0.4 | 0.3 | 0.3 |        |        |
|   |                   | 0.4 | 0.4 | 0.2 |        |        |
|   |                   | 0.5 | 0.1 | 0.4 |        |        |
|   |                   | 0.5 | 0.2 | 0.3 |        |        |
|   |                   | 0.5 | 0.3 | 0.2 |        |        |
|   |                   | 0.5 | 0.4 | 0.1 |        |        |
| 6 | Kennard-<br>Stone | 0   | 0.1 | 0.9 | 81.25% | 4.0604 |
|   |                   | 0   | 0.2 | 0.8 |        |        |
|   |                   | 0   | 0.3 | 0.7 |        |        |
|   |                   | 0   | 0.4 | 0.6 |        |        |
|   |                   | 0   | 0.5 | 0.5 |        |        |
|   |                   | 0   | 0.6 | 0.4 |        |        |
|   |                   | 0   | 0.7 | 0.3 |        |        |
|   |                   | 0   | 0.8 | 0.2 |        |        |
|   |                   | 0   | 0.9 | 0.1 |        |        |
|   |                   | 0   | 1   | 0   |        |        |
|   |                   | 0.1 | 0   | 0.9 |        |        |
|   |                   | 0.1 | 0.1 | 0.8 |        |        |
|   |                   | 0.1 | 0.2 | 0.7 |        |        |
|   |                   | 0.1 | 0.3 | 0.6 |        |        |
|   |                   | 0.1 | 0.4 | 0.5 |        |        |
|   |                   | 0.1 | 0.5 | 0.4 |        |        |
|   |                   | 0.1 | 0.6 | 0.3 |        |        |
|   |                   | 0.1 | 0.7 | 0.2 |        |        |
|   |                   | 0.1 | 0.8 | 0.1 |        |        |
|   |                   | 0.1 | 0.9 | 0   |        |        |
|   |                   | 0.2 | 0   | 0.8 |        |        |
|   |                   | 0.2 | 0.1 | 0.7 |        |        |
|   |                   | 0.2 | 0.2 | 0.6 |        |        |
|   |                   | 0.2 | 0.3 | 0.5 |        |        |
|   |                   | 0.2 | 0.4 | 0.4 |        |        |
|   |                   | 0.2 | 0.5 | 0.3 |        |        |
|   |                   | 0.2 | 0.6 | 0.2 |        |        |
|   |                   | 0.2 | 0.7 | 0.1 |        |        |
|   |                   | 0.2 | 0.8 | 0   |        |        |
|   |                   | 0.3 | 0   | 0.7 |        |        |
|   |                   | 0.3 | 0.1 | 0.6 |        |        |
|   |                   | 0.3 | 0.2 | 0.5 |        |        |
|   |                   | 0.3 | 0.3 | 0.4 |        |        |
|   |                   | 0.3 | 0.4 | 0.3 |        |        |
|   |                   | 0.3 | 0.5 | 0.2 |        |        |
|   |                   | 0.3 | 0.6 | 0.1 |        |        |
|   |                   | 0.3 | 0.7 | 0   |        |        |

|   |  |     |     |     |        |
|---|--|-----|-----|-----|--------|
|   |  | 0.4 | 0   | 0.6 |        |
|   |  | 0.4 | 0.1 | 0.5 |        |
|   |  | 0.4 | 0.2 | 0.4 |        |
|   |  | 0.4 | 0.3 | 0.3 |        |
|   |  | 0.4 | 0.4 | 0.2 |        |
|   |  | 0.4 | 0.5 | 0.1 |        |
|   |  | 0.4 | 0.6 | 0   |        |
|   |  | 0.5 | 0   | 0.5 |        |
|   |  | 0.5 | 0.1 | 0.4 |        |
|   |  | 0.5 | 0.2 | 0.3 |        |
|   |  | 0.5 | 0.3 | 0.2 |        |
|   |  | 0.5 | 0.4 | 0.1 |        |
|   |  | 0.5 | 0.5 | 0   |        |
| 7 |  | 0   | 0.1 | 0.9 | 84.38% |
|   |  | 0   | 0.2 | 0.8 |        |
|   |  | 0   | 0.3 | 0.7 |        |
|   |  | 0   | 0.4 | 0.6 |        |
|   |  | 0   | 0.5 | 0.5 |        |
|   |  | 0   | 0.6 | 0.4 |        |
|   |  | 0   | 0.7 | 0.3 |        |
|   |  | 0   | 0.8 | 0.2 |        |
|   |  | 0   | 0.9 | 0.1 |        |
|   |  | 0   | 1   | 0   |        |
|   |  | 0.1 | 0   | 0.9 |        |
|   |  | 0.1 | 0.1 | 0.8 |        |
|   |  | 0.1 | 0.2 | 0.7 |        |
|   |  | 0.1 | 0.3 | 0.6 |        |
|   |  | 0.1 | 0.4 | 0.5 |        |
|   |  | 0.1 | 0.5 | 0.4 |        |
|   |  | 0.1 | 0.6 | 0.3 |        |
|   |  | 0.1 | 0.7 | 0.2 |        |
|   |  | 0.1 | 0.8 | 0.1 |        |
|   |  | 0.1 | 0.9 | 0   |        |
|   |  | 0.2 | 0   | 0.8 |        |
|   |  | 0.2 | 0.1 | 0.7 |        |
|   |  | 0.2 | 0.2 | 0.6 |        |
|   |  | 0.2 | 0.3 | 0.5 |        |
|   |  | 0.2 | 0.4 | 0.4 |        |
|   |  | 0.2 | 0.5 | 0.3 |        |
|   |  | 0.2 | 0.6 | 0.2 |        |
|   |  | 0.2 | 0.7 | 0.1 |        |
|   |  | 0.2 | 0.8 | 0   |        |
|   |  | 0.3 | 0   | 0.7 |        |

|   |  |     |     |     |        |
|---|--|-----|-----|-----|--------|
|   |  | 0.3 | 0.1 | 0.6 |        |
|   |  | 0.3 | 0.2 | 0.5 |        |
|   |  | 0.3 | 0.3 | 0.4 |        |
|   |  | 0.3 | 0.4 | 0.3 |        |
|   |  | 0.3 | 0.5 | 0.2 |        |
|   |  | 0.3 | 0.6 | 0.1 |        |
|   |  | 0.3 | 0.7 | 0   |        |
|   |  | 0.4 | 0   | 0.6 |        |
|   |  | 0.4 | 0.1 | 0.5 |        |
|   |  | 0.4 | 0.2 | 0.4 |        |
|   |  | 0.4 | 0.3 | 0.3 |        |
|   |  | 0.4 | 0.4 | 0.2 |        |
|   |  | 0.4 | 0.5 | 0.1 |        |
|   |  | 0.4 | 0.6 | 0   |        |
|   |  | 0.5 | 0   | 0.5 |        |
|   |  | 0.5 | 0.1 | 0.4 |        |
|   |  | 0.5 | 0.2 | 0.3 |        |
|   |  | 0.5 | 0.3 | 0.2 |        |
|   |  | 0.5 | 0.4 | 0.1 |        |
|   |  | 0.5 | 0.5 | 0   |        |
| 8 |  | 0   | 0.1 | 0.9 | 78.13% |
|   |  | 0   | 0.2 | 0.8 |        |
|   |  | 0   | 0.3 | 0.7 |        |
|   |  | 0   | 0.4 | 0.6 |        |
|   |  | 0   | 0.5 | 0.5 |        |
|   |  | 0   | 0.6 | 0.4 |        |
|   |  | 0   | 0.7 | 0.3 |        |
|   |  | 0   | 0.8 | 0.2 |        |
|   |  | 0   | 0.9 | 0.1 |        |
|   |  | 0   | 1   | 0   |        |
|   |  | 0.1 | 0   | 0.9 |        |
|   |  | 0.1 | 0.1 | 0.8 |        |
|   |  | 0.1 | 0.2 | 0.7 |        |
|   |  | 0.1 | 0.3 | 0.6 |        |
|   |  | 0.1 | 0.4 | 0.5 |        |
|   |  | 0.1 | 0.5 | 0.4 |        |
|   |  | 0.1 | 0.6 | 0.3 |        |
|   |  | 0.1 | 0.7 | 0.2 |        |
|   |  | 0.1 | 0.8 | 0.1 |        |
|   |  | 0.1 | 0.9 | 0   |        |
|   |  | 0.2 | 0   | 0.8 |        |
|   |  | 0.2 | 0.1 | 0.7 |        |
|   |  | 0.2 | 0.2 | 0.6 |        |

|   |  |     |     |     |        |
|---|--|-----|-----|-----|--------|
|   |  | 0.2 | 0.3 | 0.5 |        |
|   |  | 0.2 | 0.4 | 0.4 |        |
|   |  | 0.2 | 0.5 | 0.3 |        |
|   |  | 0.2 | 0.6 | 0.2 |        |
|   |  | 0.2 | 0.7 | 0.1 |        |
|   |  | 0.2 | 0.8 | 0   |        |
|   |  | 0.3 | 0   | 0.7 |        |
|   |  | 0.3 | 0.1 | 0.6 |        |
|   |  | 0.3 | 0.2 | 0.5 |        |
|   |  | 0.3 | 0.3 | 0.4 |        |
|   |  | 0.3 | 0.4 | 0.3 |        |
|   |  | 0.3 | 0.5 | 0.2 |        |
|   |  | 0.3 | 0.6 | 0.1 |        |
|   |  | 0.3 | 0.7 | 0   |        |
|   |  | 0.4 | 0   | 0.6 |        |
|   |  | 0.4 | 0.1 | 0.5 |        |
|   |  | 0.4 | 0.2 | 0.4 |        |
|   |  | 0.4 | 0.3 | 0.3 |        |
|   |  | 0.4 | 0.4 | 0.2 |        |
|   |  | 0.4 | 0.5 | 0.1 |        |
|   |  | 0.4 | 0.6 | 0   |        |
|   |  | 0.5 | 0   | 0.5 |        |
|   |  | 0.5 | 0.1 | 0.4 |        |
|   |  | 0.5 | 0.2 | 0.3 |        |
|   |  | 0.5 | 0.3 | 0.2 |        |
|   |  | 0.5 | 0.4 | 0.1 |        |
|   |  | 0.5 | 0.5 | 0   |        |
| 9 |  | 0   | 0.1 | 0.9 | 81.25% |
|   |  | 0   | 0.2 | 0.8 |        |
|   |  | 0   | 0.3 | 0.7 |        |
|   |  | 0   | 0.4 | 0.6 |        |
|   |  | 0   | 0.5 | 0.5 |        |
|   |  | 0   | 0.6 | 0.4 |        |
|   |  | 0   | 0.7 | 0.3 |        |
|   |  | 0   | 0.8 | 0.2 |        |
|   |  | 0   | 0.9 | 0.1 |        |
|   |  | 0   | 1   | 0   |        |
|   |  | 0.1 | 0   | 0.9 |        |
|   |  | 0.1 | 0.1 | 0.8 |        |
|   |  | 0.1 | 0.2 | 0.7 |        |
|   |  | 0.1 | 0.3 | 0.6 |        |
|   |  | 0.1 | 0.4 | 0.5 |        |
|   |  | 0.1 | 0.5 | 0.4 |        |

|    |  |     |     |     |        |
|----|--|-----|-----|-----|--------|
|    |  | 0.1 | 0.6 | 0.3 |        |
|    |  | 0.1 | 0.7 | 0.2 |        |
|    |  | 0.1 | 0.8 | 0.1 |        |
|    |  | 0.1 | 0.9 | 0   |        |
|    |  | 0.2 | 0   | 0.8 |        |
|    |  | 0.2 | 0.1 | 0.7 |        |
|    |  | 0.2 | 0.2 | 0.6 |        |
|    |  | 0.2 | 0.3 | 0.5 |        |
|    |  | 0.2 | 0.4 | 0.4 |        |
|    |  | 0.2 | 0.5 | 0.3 |        |
|    |  | 0.2 | 0.6 | 0.2 |        |
|    |  | 0.2 | 0.7 | 0.1 |        |
|    |  | 0.2 | 0.8 | 0   |        |
|    |  | 0.3 | 0   | 0.7 |        |
|    |  | 0.3 | 0.1 | 0.6 |        |
|    |  | 0.3 | 0.2 | 0.5 |        |
|    |  | 0.3 | 0.3 | 0.4 |        |
|    |  | 0.3 | 0.4 | 0.3 |        |
|    |  | 0.3 | 0.5 | 0.2 |        |
|    |  | 0.3 | 0.6 | 0.1 |        |
|    |  | 0.3 | 0.7 | 0   |        |
|    |  | 0.4 | 0   | 0.6 |        |
|    |  | 0.4 | 0.1 | 0.5 |        |
|    |  | 0.4 | 0.2 | 0.4 |        |
|    |  | 0.4 | 0.3 | 0.3 |        |
|    |  | 0.4 | 0.4 | 0.2 |        |
|    |  | 0.4 | 0.5 | 0.1 |        |
|    |  | 0.4 | 0.6 | 0   |        |
|    |  | 0.5 | 0   | 0.5 |        |
|    |  | 0.5 | 0.1 | 0.4 |        |
|    |  | 0.5 | 0.2 | 0.3 |        |
|    |  | 0.5 | 0.3 | 0.2 |        |
|    |  | 0.5 | 0.4 | 0.1 |        |
|    |  | 0.5 | 0.5 | 0   |        |
| 10 |  | 0   | 0.1 | 0.9 | 78.13% |
|    |  | 0   | 0.2 | 0.8 |        |
|    |  | 0   | 0.3 | 0.7 |        |
|    |  | 0   | 0.4 | 0.6 |        |
|    |  | 0   | 0.5 | 0.5 |        |
|    |  | 0   | 0.6 | 0.4 |        |
|    |  | 0   | 0.7 | 0.3 |        |
|    |  | 0   | 0.8 | 0.2 |        |
|    |  | 0   | 0.9 | 0.1 |        |

|    |                    |     |     |     |        |        |
|----|--------------------|-----|-----|-----|--------|--------|
|    |                    | 0   | 1   | 0   |        |        |
|    |                    | 0.1 | 0   | 0.9 |        |        |
|    |                    | 0.1 | 0.1 | 0.8 |        |        |
|    |                    | 0.1 | 0.2 | 0.7 |        |        |
|    |                    | 0.1 | 0.3 | 0.6 |        |        |
|    |                    | 0.1 | 0.4 | 0.5 |        |        |
|    |                    | 0.1 | 0.5 | 0.4 |        |        |
|    |                    | 0.1 | 0.6 | 0.3 |        |        |
|    |                    | 0.1 | 0.7 | 0.2 |        |        |
|    |                    | 0.1 | 0.8 | 0.1 |        |        |
|    |                    | 0.1 | 0.9 | 0   |        |        |
|    |                    | 0.2 | 0   | 0.8 |        |        |
|    |                    | 0.2 | 0.1 | 0.7 |        |        |
|    |                    | 0.2 | 0.2 | 0.6 |        |        |
|    |                    | 0.2 | 0.3 | 0.5 |        |        |
|    |                    | 0.2 | 0.4 | 0.4 |        |        |
|    |                    | 0.2 | 0.5 | 0.3 |        |        |
|    |                    | 0.2 | 0.6 | 0.2 |        |        |
|    |                    | 0.2 | 0.7 | 0.1 |        |        |
|    |                    | 0.2 | 0.8 | 0   |        |        |
|    |                    | 0.3 | 0   | 0.7 |        |        |
|    |                    | 0.3 | 0.1 | 0.6 |        |        |
|    |                    | 0.3 | 0.2 | 0.5 |        |        |
|    |                    | 0.3 | 0.3 | 0.4 |        |        |
|    |                    | 0.3 | 0.4 | 0.3 |        |        |
|    |                    | 0.3 | 0.5 | 0.2 |        |        |
|    |                    | 0.3 | 0.6 | 0.1 |        |        |
|    |                    | 0.3 | 0.7 | 0   |        |        |
|    |                    | 0.4 | 0   | 0.6 |        |        |
|    |                    | 0.4 | 0.1 | 0.5 |        |        |
|    |                    | 0.4 | 0.2 | 0.4 |        |        |
|    |                    | 0.4 | 0.3 | 0.3 |        |        |
|    |                    | 0.4 | 0.4 | 0.2 |        |        |
|    |                    | 0.4 | 0.5 | 0.1 |        |        |
|    |                    | 0.4 | 0.6 | 0   |        |        |
|    |                    | 0.5 | 0   | 0.5 |        |        |
|    |                    | 0.5 | 0.1 | 0.4 |        |        |
|    |                    | 0.5 | 0.2 | 0.3 |        |        |
|    |                    | 0.5 | 0.3 | 0.2 |        |        |
|    |                    | 0.5 | 0.4 | 0.1 |        |        |
|    |                    | 0.5 | 0.5 | 0   |        |        |
| 11 | Modified-k-medoids | 0   | 0.1 | 0.9 | 80.65% | 4.0604 |

|  |  |     |     |     |  |  |
|--|--|-----|-----|-----|--|--|
|  |  | 0   | 0.2 | 0.8 |  |  |
|  |  | 0   | 0.3 | 0.7 |  |  |
|  |  | 0   | 0.4 | 0.6 |  |  |
|  |  | 0   | 0.5 | 0.5 |  |  |
|  |  | 0   | 0.6 | 0.4 |  |  |
|  |  | 0   | 0.7 | 0.3 |  |  |
|  |  | 0   | 0.8 | 0.2 |  |  |
|  |  | 0   | 0.9 | 0.1 |  |  |
|  |  | 0   | 1   | 0   |  |  |
|  |  | 0.1 | 0   | 0.9 |  |  |
|  |  | 0.1 | 0.1 | 0.8 |  |  |
|  |  | 0.1 | 0.2 | 0.7 |  |  |
|  |  | 0.1 | 0.3 | 0.6 |  |  |
|  |  | 0.1 | 0.4 | 0.5 |  |  |
|  |  | 0.1 | 0.5 | 0.4 |  |  |
|  |  | 0.1 | 0.6 | 0.3 |  |  |
|  |  | 0.1 | 0.7 | 0.2 |  |  |
|  |  | 0.1 | 0.8 | 0.1 |  |  |
|  |  | 0.1 | 0.9 | 0   |  |  |
|  |  | 0.2 | 0   | 0.8 |  |  |
|  |  | 0.2 | 0.1 | 0.7 |  |  |
|  |  | 0.2 | 0.2 | 0.6 |  |  |
|  |  | 0.2 | 0.3 | 0.5 |  |  |
|  |  | 0.2 | 0.4 | 0.4 |  |  |
|  |  | 0.2 | 0.5 | 0.3 |  |  |
|  |  | 0.2 | 0.6 | 0.2 |  |  |
|  |  | 0.2 | 0.7 | 0.1 |  |  |
|  |  | 0.2 | 0.8 | 0   |  |  |
|  |  | 0.3 | 0   | 0.7 |  |  |
|  |  | 0.3 | 0.1 | 0.6 |  |  |
|  |  | 0.3 | 0.2 | 0.5 |  |  |
|  |  | 0.3 | 0.3 | 0.4 |  |  |
|  |  | 0.3 | 0.4 | 0.3 |  |  |
|  |  | 0.3 | 0.5 | 0.2 |  |  |
|  |  | 0.3 | 0.6 | 0.1 |  |  |
|  |  | 0.3 | 0.7 | 0   |  |  |
|  |  | 0.4 | 0   | 0.6 |  |  |
|  |  | 0.4 | 0.1 | 0.5 |  |  |
|  |  | 0.4 | 0.2 | 0.4 |  |  |
|  |  | 0.4 | 0.3 | 0.3 |  |  |
|  |  | 0.4 | 0.4 | 0.2 |  |  |
|  |  | 0.4 | 0.5 | 0.1 |  |  |
|  |  | 0.4 | 0.6 | 0   |  |  |

|    |  |     |     |     |        |
|----|--|-----|-----|-----|--------|
|    |  | 0.5 | 0   | 0.5 |        |
|    |  | 0.5 | 0.1 | 0.4 |        |
|    |  | 0.5 | 0.2 | 0.3 |        |
|    |  | 0.5 | 0.3 | 0.2 |        |
|    |  | 0.5 | 0.4 | 0.1 |        |
|    |  | 0.5 | 0.5 | 0   |        |
| 12 |  | 0.3 | 0   | 0.7 | 83.87% |
|    |  | 0.3 | 0.1 | 0.6 |        |
|    |  | 0.3 | 0.2 | 0.5 |        |
|    |  | 0.3 | 0.3 | 0.4 |        |
|    |  | 0.3 | 0.4 | 0.3 |        |
|    |  | 0.3 | 0.7 | 0   |        |
|    |  | 0.4 | 0   | 0.6 |        |
|    |  | 0.4 | 0.2 | 0.4 |        |
|    |  | 0.4 | 0.3 | 0.3 |        |
|    |  | 0.4 | 0.4 | 0.2 |        |
|    |  | 0.4 | 0.5 | 0.1 |        |
|    |  | 0.4 | 0.6 | 0   |        |
|    |  | 0.5 | 0   | 0.5 |        |
|    |  | 0.5 | 0.1 | 0.4 |        |
|    |  | 0.5 | 0.2 | 0.3 |        |
|    |  | 0.5 | 0.3 | 0.2 |        |
|    |  | 0.5 | 0.4 | 0.1 |        |
|    |  | 0.5 | 0.5 | 0   |        |
| 13 |  | 0   | 0.1 | 0.9 | 80.65% |
|    |  | 0   | 0.2 | 0.8 |        |
|    |  | 0   | 0.3 | 0.7 |        |
|    |  | 0   | 0.4 | 0.6 |        |
|    |  | 0   | 0.5 | 0.5 |        |
|    |  | 0   | 0.6 | 0.4 |        |
|    |  | 0   | 0.7 | 0.3 |        |
|    |  | 0   | 0.8 | 0.2 |        |
|    |  | 0   | 0.9 | 0.1 |        |
|    |  | 0   | 1   | 0   |        |
|    |  | 0.1 | 0   | 0.9 |        |
|    |  | 0.1 | 0.1 | 0.8 |        |
|    |  | 0.1 | 0.2 | 0.7 |        |
|    |  | 0.1 | 0.3 | 0.6 |        |
|    |  | 0.1 | 0.4 | 0.5 |        |
|    |  | 0.1 | 0.5 | 0.4 |        |
|    |  | 0.1 | 0.6 | 0.3 |        |
|    |  | 0.1 | 0.7 | 0.2 |        |
|    |  | 0.1 | 0.9 | 0   |        |

|    |  |     |     |     |        |
|----|--|-----|-----|-----|--------|
|    |  | 0.2 | 0   | 0.8 |        |
|    |  | 0.2 | 0.1 | 0.7 |        |
|    |  | 0.2 | 0.2 | 0.6 |        |
|    |  | 0.2 | 0.3 | 0.5 |        |
|    |  | 0.2 | 0.5 | 0.3 |        |
|    |  | 0.2 | 0.6 | 0.2 |        |
|    |  | 0.2 | 0.7 | 0.1 |        |
|    |  | 0.2 | 0.8 | 0   |        |
| 14 |  | 0   | 0.1 | 0.9 | 80.65% |
|    |  | 0   | 0.2 | 0.8 |        |
|    |  | 0.1 | 0   | 0.9 |        |
|    |  | 0.1 | 0.1 | 0.8 |        |
|    |  | 0.1 | 0.2 | 0.7 |        |
|    |  | 0.2 | 0   | 0.8 |        |
|    |  | 0.2 | 0.1 | 0.7 |        |
|    |  | 0.3 | 0.1 | 0.6 |        |
|    |  | 0.3 | 0.2 | 0.5 |        |
|    |  | 0.4 | 0   | 0.6 |        |
|    |  | 0.4 | 0.1 | 0.5 |        |
|    |  | 0.4 | 0.2 | 0.4 |        |
|    |  | 0.5 | 0   | 0.5 |        |
|    |  | 0.5 | 0.1 | 0.4 |        |
|    |  | 0.5 | 0.2 | 0.3 |        |
| 15 |  | 0   | 0.1 | 0.9 | 87.10% |
|    |  | 0   | 0.2 | 0.8 |        |
|    |  | 0.1 | 0   | 0.9 |        |
|    |  | 0.1 | 0.1 | 0.8 |        |
|    |  | 0.1 | 0.2 | 0.7 |        |
|    |  | 0.2 | 0   | 0.8 |        |
|    |  | 0.2 | 0.1 | 0.7 |        |
|    |  | 0.2 | 0.2 | 0.6 |        |
|    |  | 0.3 | 0   | 0.7 |        |
|    |  | 0.3 | 0.1 | 0.6 |        |
|    |  | 0.3 | 0.2 | 0.5 |        |
|    |  | 0.4 | 0   | 0.6 |        |
|    |  | 0.4 | 0.1 | 0.5 |        |
|    |  | 0.4 | 0.2 | 0.4 |        |
|    |  | 0.5 | 0   | 0.5 |        |
|    |  | 0.5 | 0.1 | 0.4 |        |
|    |  | 0.5 | 0.2 | 0.3 |        |

**Table S5** Automated weighting analysis for Persistent, bioaccumulative and toxic (PBT) index of chemicals (Model Dataset 5)

| Model | Division method | Best weighting combinations |     |     | % Correct predictions (Test set) | Training set range |
|-------|-----------------|-----------------------------|-----|-----|----------------------------------|--------------------|
| 1     | Sorted response | 0                           | 0.5 | 0.5 | 100%                             | 8.1                |
|       |                 | 0.1                         | 0.5 | 0.4 |                                  |                    |
|       |                 | 0.2                         | 0.5 | 0.3 |                                  |                    |
|       |                 | 0.3                         | 0.5 | 0.2 |                                  |                    |
|       |                 | 0.4                         | 0.5 | 0.1 |                                  |                    |
|       |                 | 0.5                         | 0.5 | 0   |                                  |                    |
| 2     |                 | 0.5                         | 0   | 0.5 | 100%                             |                    |
| 3     |                 | 0.5                         | 0   | 0.5 | 100%                             |                    |
| 4     |                 | 0                           | 0.5 | 0.5 | 97.22%                           |                    |
|       |                 | 0                           | 0.6 | 0.4 |                                  |                    |
|       |                 | 0                           | 0.7 | 0.3 |                                  |                    |
|       |                 | 0                           | 0.8 | 0.2 |                                  |                    |
|       |                 | 0                           | 0.9 | 0.1 |                                  |                    |
|       |                 | 0                           | 1   | 0   |                                  |                    |
|       |                 | 0.1                         | 0.5 | 0.4 |                                  |                    |
|       |                 | 0.1                         | 0.6 | 0.3 |                                  |                    |
|       |                 | 0.1                         | 0.7 | 0.2 |                                  |                    |
|       |                 | 0.1                         | 0.8 | 0.1 |                                  |                    |
|       |                 | 0.1                         | 0.9 | 0   |                                  |                    |
|       |                 | 0.2                         | 0.5 | 0.3 |                                  |                    |
|       |                 | 0.2                         | 0.6 | 0.2 |                                  |                    |
|       |                 | 0.2                         | 0.7 | 0.1 |                                  |                    |
|       |                 | 0.2                         | 0.8 | 0   |                                  |                    |
|       |                 | 0.3                         | 0.5 | 0.2 |                                  |                    |
|       |                 | 0.3                         | 0.6 | 0.1 |                                  |                    |
|       |                 | 0.3                         | 0.7 | 0   |                                  |                    |
|       |                 | 0.4                         | 0.5 | 0.1 |                                  |                    |
|       |                 | 0.4                         | 0.6 | 0   |                                  |                    |
|       |                 | 0.5                         | 0.5 | 0   |                                  |                    |
| 5     |                 | 0                           | 0.1 | 0.9 | 88.89%                           |                    |
|       |                 | 0                           | 0.2 | 0.8 |                                  |                    |
|       |                 | 0                           | 0.5 | 0.5 |                                  |                    |
|       |                 | 0                           | 0.6 | 0.4 |                                  |                    |
|       |                 | 0                           | 0.7 | 0.3 |                                  |                    |
|       |                 | 0                           | 0.8 | 0.2 |                                  |                    |
|       |                 | 0                           | 0.9 | 0.1 |                                  |                    |
|       |                 | 0                           | 1   | 0   |                                  |                    |

|   |               |     |     |     |        |     |
|---|---------------|-----|-----|-----|--------|-----|
|   |               | 0.1 | 0   | 0.9 |        |     |
|   |               | 0.1 | 0.1 | 0.8 |        |     |
|   |               | 0.1 | 0.2 | 0.7 |        |     |
|   |               | 0.1 | 0.5 | 0.4 |        |     |
|   |               | 0.1 | 0.6 | 0.3 |        |     |
|   |               | 0.1 | 0.7 | 0.2 |        |     |
|   |               | 0.1 | 0.8 | 0.1 |        |     |
|   |               | 0.1 | 0.9 | 0   |        |     |
|   |               | 0.2 | 0   | 0.8 |        |     |
|   |               | 0.2 | 0.1 | 0.7 |        |     |
|   |               | 0.2 | 0.2 | 0.6 |        |     |
|   |               | 0.2 | 0.5 | 0.3 |        |     |
|   |               | 0.2 | 0.6 | 0.2 |        |     |
|   |               | 0.2 | 0.7 | 0.1 |        |     |
|   |               | 0.2 | 0.8 | 0   |        |     |
|   |               | 0.3 | 0   | 0.7 |        |     |
|   |               | 0.3 | 0.1 | 0.6 |        |     |
|   |               | 0.3 | 0.2 | 0.5 |        |     |
|   |               | 0.3 | 0.5 | 0.2 |        |     |
|   |               | 0.3 | 0.6 | 0.1 |        |     |
|   |               | 0.3 | 0.7 | 0   |        |     |
|   |               | 0.4 | 0   | 0.6 |        |     |
|   |               | 0.4 | 0.1 | 0.5 |        |     |
|   |               | 0.4 | 0.2 | 0.4 |        |     |
|   |               | 0.4 | 0.5 | 0.1 |        |     |
|   |               | 0.4 | 0.6 | 0   |        |     |
|   |               | 0.5 | 0   | 0.5 |        |     |
|   |               | 0.5 | 0.1 | 0.4 |        |     |
|   |               | 0.5 | 0.2 | 0.3 |        |     |
|   |               | 0.5 | 0.5 | 0   |        |     |
| 6 | Kennard-Stone | 0.3 | 0.2 | 0.5 | 95.56% | 8.1 |
|   |               | 0.4 | 0.1 | 0.5 |        |     |
|   |               | 0.4 | 0.2 | 0.4 |        |     |
|   |               | 0.5 | 0   | 0.5 |        |     |
|   |               | 0.5 | 0.1 | 0.4 |        |     |
|   |               | 0.5 | 0.2 | 0.3 |        |     |
| 7 | Kennard-Stone | 0   | 0.5 | 0.5 | 95.56% |     |
|   |               | 0   | 0.6 | 0.4 |        |     |
|   |               | 0   | 0.7 | 0.3 |        |     |
|   |               | 0   | 0.8 | 0.2 |        |     |
|   |               | 0   | 0.9 | 0.1 |        |     |
|   |               | 0   | 1   | 0   |        |     |
|   |               | 0.1 | 0.4 | 0.5 |        |     |

|   |  |     |     |     |        |
|---|--|-----|-----|-----|--------|
|   |  | 0.1 | 0.5 | 0.4 |        |
|   |  | 0.1 | 0.6 | 0.3 |        |
|   |  | 0.1 | 0.7 | 0.2 |        |
|   |  | 0.1 | 0.8 | 0.1 |        |
|   |  | 0.1 | 0.9 | 0   |        |
|   |  | 0.2 | 0.3 | 0.5 |        |
|   |  | 0.2 | 0.4 | 0.4 |        |
|   |  | 0.2 | 0.5 | 0.3 |        |
|   |  | 0.2 | 0.6 | 0.2 |        |
|   |  | 0.2 | 0.7 | 0.1 |        |
|   |  | 0.2 | 0.8 | 0   |        |
|   |  | 0.3 | 0.2 | 0.5 |        |
|   |  | 0.3 | 0.3 | 0.4 |        |
|   |  | 0.3 | 0.4 | 0.3 |        |
|   |  | 0.3 | 0.5 | 0.2 |        |
|   |  | 0.3 | 0.6 | 0.1 |        |
|   |  | 0.3 | 0.7 | 0   |        |
|   |  | 0.4 | 0.1 | 0.5 |        |
|   |  | 0.4 | 0.2 | 0.4 |        |
|   |  | 0.4 | 0.3 | 0.3 |        |
|   |  | 0.4 | 0.4 | 0.2 |        |
|   |  | 0.4 | 0.5 | 0.1 |        |
|   |  | 0.4 | 0.6 | 0   |        |
|   |  | 0.5 | 0   | 0.5 |        |
|   |  | 0.5 | 0.1 | 0.4 |        |
|   |  | 0.5 | 0.2 | 0.3 |        |
|   |  | 0.5 | 0.3 | 0.2 |        |
|   |  | 0.5 | 0.4 | 0.1 |        |
|   |  | 0.5 | 0.5 | 0   |        |
| 8 |  | 0   | 0.5 | 0.5 | 95.56% |
|   |  | 0   | 0.6 | 0.4 |        |
|   |  | 0   | 0.7 | 0.3 |        |
|   |  | 0   | 0.8 | 0.2 |        |
|   |  | 0   | 0.9 | 0.1 |        |
|   |  | 0   | 1   | 0   |        |
|   |  | 0.1 | 0.4 | 0.5 |        |
|   |  | 0.1 | 0.5 | 0.4 |        |
|   |  | 0.1 | 0.6 | 0.3 |        |
|   |  | 0.1 | 0.7 | 0.2 |        |
|   |  | 0.1 | 0.8 | 0.1 |        |
|   |  | 0.1 | 0.9 | 0   |        |
|   |  | 0.2 | 0.3 | 0.5 |        |
|   |  | 0.2 | 0.4 | 0.4 |        |

|   |  |     |     |     |        |
|---|--|-----|-----|-----|--------|
|   |  | 0.2 | 0.5 | 0.3 |        |
|   |  | 0.2 | 0.6 | 0.2 |        |
|   |  | 0.2 | 0.7 | 0.1 |        |
|   |  | 0.2 | 0.8 | 0   |        |
|   |  | 0.3 | 0.2 | 0.5 |        |
|   |  | 0.3 | 0.3 | 0.4 |        |
|   |  | 0.3 | 0.4 | 0.3 |        |
|   |  | 0.3 | 0.5 | 0.2 |        |
|   |  | 0.3 | 0.6 | 0.1 |        |
|   |  | 0.3 | 0.7 | 0   |        |
|   |  | 0.4 | 0.1 | 0.5 |        |
|   |  | 0.4 | 0.2 | 0.4 |        |
|   |  | 0.4 | 0.3 | 0.3 |        |
|   |  | 0.4 | 0.4 | 0.2 |        |
|   |  | 0.4 | 0.5 | 0.1 |        |
|   |  | 0.4 | 0.6 | 0   |        |
|   |  | 0.5 | 0   | 0.5 |        |
|   |  | 0.5 | 0.1 | 0.4 |        |
|   |  | 0.5 | 0.2 | 0.3 |        |
|   |  | 0.5 | 0.3 | 0.2 |        |
|   |  | 0.5 | 0.4 | 0.1 |        |
|   |  | 0.5 | 0.5 | 0   |        |
| 9 |  | 0   | 0.5 | 0.5 | 95.56% |
|   |  | 0   | 0.6 | 0.4 |        |
|   |  | 0   | 0.7 | 0.3 |        |
|   |  | 0   | 0.8 | 0.2 |        |
|   |  | 0   | 0.9 | 0.1 |        |
|   |  | 0   | 1   | 0   |        |
|   |  | 0.1 | 0.4 | 0.5 |        |
|   |  | 0.1 | 0.5 | 0.4 |        |
|   |  | 0.1 | 0.6 | 0.3 |        |
|   |  | 0.1 | 0.7 | 0.2 |        |
|   |  | 0.1 | 0.8 | 0.1 |        |
|   |  | 0.1 | 0.9 | 0   |        |
|   |  | 0.2 | 0.3 | 0.5 |        |
|   |  | 0.2 | 0.4 | 0.4 |        |
|   |  | 0.2 | 0.5 | 0.3 |        |
|   |  | 0.2 | 0.6 | 0.2 |        |
|   |  | 0.2 | 0.7 | 0.1 |        |
|   |  | 0.2 | 0.8 | 0   |        |
|   |  | 0.3 | 0.2 | 0.5 |        |
|   |  | 0.3 | 0.3 | 0.4 |        |
|   |  | 0.3 | 0.4 | 0.3 |        |

|    |  |     |     |     |        |
|----|--|-----|-----|-----|--------|
|    |  | 0.3 | 0.5 | 0.2 |        |
|    |  | 0.3 | 0.6 | 0.1 |        |
|    |  | 0.3 | 0.7 | 0   |        |
|    |  | 0.4 | 0.1 | 0.5 |        |
|    |  | 0.4 | 0.2 | 0.4 |        |
|    |  | 0.4 | 0.3 | 0.3 |        |
|    |  | 0.4 | 0.4 | 0.2 |        |
|    |  | 0.4 | 0.5 | 0.1 |        |
|    |  | 0.4 | 0.6 | 0   |        |
|    |  | 0.5 | 0   | 0.5 |        |
|    |  | 0.5 | 0.1 | 0.4 |        |
|    |  | 0.5 | 0.2 | 0.3 |        |
|    |  | 0.5 | 0.3 | 0.2 |        |
|    |  | 0.5 | 0.4 | 0.1 |        |
|    |  | 0.5 | 0.5 | 0   |        |
| 10 |  | 0   | 0.5 | 0.5 | 95.56% |
|    |  | 0   | 0.6 | 0.4 |        |
|    |  | 0   | 0.7 | 0.3 |        |
|    |  | 0   | 0.8 | 0.2 |        |
|    |  | 0   | 0.9 | 0.1 |        |
|    |  | 0   | 1   | 0   |        |
|    |  | 0.1 | 0.4 | 0.5 |        |
|    |  | 0.1 | 0.5 | 0.4 |        |
|    |  | 0.1 | 0.6 | 0.3 |        |
|    |  | 0.1 | 0.7 | 0.2 |        |
|    |  | 0.1 | 0.8 | 0.1 |        |
|    |  | 0.1 | 0.9 | 0   |        |
|    |  | 0.2 | 0.3 | 0.5 |        |
|    |  | 0.2 | 0.4 | 0.4 |        |
|    |  | 0.2 | 0.5 | 0.3 |        |
|    |  | 0.2 | 0.6 | 0.2 |        |
|    |  | 0.2 | 0.7 | 0.1 |        |
|    |  | 0.2 | 0.8 | 0   |        |
|    |  | 0.3 | 0.2 | 0.5 |        |
|    |  | 0.3 | 0.3 | 0.4 |        |
|    |  | 0.3 | 0.4 | 0.3 |        |
|    |  | 0.3 | 0.5 | 0.2 |        |
|    |  | 0.3 | 0.6 | 0.1 |        |
|    |  | 0.3 | 0.7 | 0   |        |
|    |  | 0.4 | 0.1 | 0.5 |        |
|    |  | 0.4 | 0.2 | 0.4 |        |
|    |  | 0.4 | 0.3 | 0.3 |        |
|    |  | 0.4 | 0.4 | 0.2 |        |

|    |                    |     |     |     |        |      |
|----|--------------------|-----|-----|-----|--------|------|
|    |                    | 0.4 | 0.5 | 0.1 |        |      |
|    |                    | 0.4 | 0.6 | 0   |        |      |
|    |                    | 0.5 | 0   | 0.5 |        |      |
|    |                    | 0.5 | 0.1 | 0.4 |        |      |
|    |                    | 0.5 | 0.2 | 0.3 |        |      |
|    |                    | 0.5 | 0.3 | 0.2 |        |      |
|    |                    | 0.5 | 0.4 | 0.1 |        |      |
|    |                    | 0.5 | 0.5 | 0   |        |      |
| 11 | Modified-k-medoids | 0   | 0.1 | 0.9 | 93.18% | 7.24 |
|    |                    | 0   | 0.2 | 0.8 |        |      |
|    |                    | 0.1 | 0   | 0.9 |        |      |
|    |                    | 0.1 | 0.1 | 0.8 |        |      |
|    |                    | 0.1 | 0.2 | 0.7 |        |      |
|    |                    | 0.2 | 0   | 0.8 |        |      |
|    |                    | 0.2 | 0.1 | 0.7 |        |      |
|    |                    | 0.2 | 0.2 | 0.6 |        |      |
|    |                    | 0.3 | 0   | 0.7 |        |      |
|    |                    | 0.3 | 0.1 | 0.6 |        |      |
|    |                    | 0.4 | 0   | 0.6 |        |      |
| 12 |                    | 0   | 0.1 | 0.9 | 86.36% |      |
|    |                    | 0   | 0.2 | 0.8 |        |      |
|    |                    | 0   | 0.3 | 0.7 |        |      |
|    |                    | 0   | 0.4 | 0.6 |        |      |
|    |                    | 0   | 0.5 | 0.5 |        |      |
|    |                    | 0   | 0.6 | 0.4 |        |      |
|    |                    | 0   | 0.7 | 0.3 |        |      |
|    |                    | 0   | 0.8 | 0.2 |        |      |
|    |                    | 0   | 0.9 | 0.1 |        |      |
|    |                    | 0   | 1   | 0   |        |      |
|    |                    | 0.1 | 0   | 0.9 |        |      |
|    |                    | 0.1 | 0.1 | 0.8 |        |      |
|    |                    | 0.1 | 0.2 | 0.7 |        |      |
|    |                    | 0.1 | 0.3 | 0.6 |        |      |
|    |                    | 0.1 | 0.5 | 0.4 |        |      |
|    |                    | 0.1 | 0.6 | 0.3 |        |      |
|    |                    | 0.1 | 0.7 | 0.2 |        |      |
|    |                    | 0.1 | 0.8 | 0.1 |        |      |
|    |                    | 0.1 | 0.9 | 0   |        |      |
|    |                    | 0.2 | 0   | 0.8 |        |      |
|    |                    | 0.2 | 0.1 | 0.7 |        |      |
|    |                    | 0.2 | 0.2 | 0.6 |        |      |
|    |                    | 0.2 | 0.5 | 0.3 |        |      |
|    |                    | 0.2 | 0.6 | 0.2 |        |      |

|    |  |     |     |     |        |
|----|--|-----|-----|-----|--------|
|    |  | 0.2 | 0.7 | 0.1 |        |
|    |  | 0.2 | 0.8 | 0   |        |
|    |  | 0.3 | 0   | 0.7 |        |
|    |  | 0.3 | 0.1 | 0.6 |        |
|    |  | 0.3 | 0.5 | 0.2 |        |
|    |  | 0.3 | 0.6 | 0.1 |        |
|    |  | 0.3 | 0.7 | 0   |        |
|    |  | 0.4 | 0   | 0.6 |        |
|    |  | 0.4 | 0.5 | 0.1 |        |
|    |  | 0.4 | 0.6 | 0   |        |
|    |  | 0.5 | 0   | 0.5 |        |
|    |  | 0.5 | 0.5 | 0   |        |
| 13 |  | 0   | 0.1 | 0.9 | 93.18% |
|    |  | 0   | 0.2 | 0.8 |        |
|    |  | 0.1 | 0   | 0.9 |        |
|    |  | 0.1 | 0.1 | 0.8 |        |
|    |  | 0.1 | 0.2 | 0.7 |        |
|    |  | 0.2 | 0   | 0.8 |        |
|    |  | 0.2 | 0.1 | 0.7 |        |
|    |  | 0.3 | 0.1 | 0.6 |        |
|    |  | 0.4 | 0   | 0.6 |        |
|    |  | 0.5 | 0   | 0.5 |        |
|    |  | 0.5 | 0.1 | 0.4 |        |
|    |  | 0.5 | 0.2 | 0.3 |        |
| 14 |  | 0   | 0.5 | 0.5 | 95.45% |
|    |  | 0.1 | 0.5 | 0.4 |        |
|    |  | 0.2 | 0.5 | 0.3 |        |
|    |  | 0.3 | 0.5 | 0.2 |        |
|    |  | 0.4 | 0.5 | 0.1 |        |
|    |  | 0.5 | 0.5 | 0   |        |
| 15 |  | 0   | 0.1 | 0.9 | 93.18% |
|    |  | 0   | 0.2 | 0.8 |        |
|    |  | 0.1 | 0   | 0.9 |        |
|    |  | 0.1 | 0.1 | 0.8 |        |
|    |  | 0.1 | 0.2 | 0.7 |        |
|    |  | 0.2 | 0   | 0.8 |        |
|    |  | 0.2 | 0.1 | 0.7 |        |
|    |  | 0.2 | 0.2 | 0.6 |        |
|    |  | 0.3 | 0   | 0.7 |        |
|    |  | 0.3 | 0.1 | 0.6 |        |
|    |  | 0.4 | 0   | 0.6 |        |
|    |  | 0.5 | 0   | 0.5 |        |
|    |  | 0.5 | 0.1 | 0.4 |        |

|  |  |     |     |     |  |  |
|--|--|-----|-----|-----|--|--|
|  |  | 0.5 | 0.2 | 0.3 |  |  |
|--|--|-----|-----|-----|--|--|

**Table S6** Automated weighting analysis for refractive index of polymers dataset (True external dataset 1)

| Model | Combination found with model |     |     | % Correct predictions (Test set) | % Correct predictions (True external set) |
|-------|------------------------------|-----|-----|----------------------------------|-------------------------------------------|
| 1     | 0.5                          | 0   | 0.5 | 98.51%                           | 94.90%                                    |
| 2     | 0                            | 0.5 | 0.5 | 97.01%                           | 89.80%                                    |
|       | 0.5                          | 0   | 0.5 |                                  | 91.84%                                    |
| 3     | 0.5                          | 0   | 0.5 | 97.01%                           | 94.90%                                    |
| 4     | 0.5                          | 0   | 0.5 | 97.01%                           | 94.90%                                    |
| 5     | 0.5                          | 0   | 0.5 | 98.51%                           | 98.51%                                    |

**Table S7** Automated weighting analysis for BACE1 dataset (True external dataset 2)

| Model | Combination found with model |     |        | % Correct predictions (Test set) | % Correct predictions (True external set) |
|-------|------------------------------|-----|--------|----------------------------------|-------------------------------------------|
| 1     | 0                            | 0.1 | 0.9    | 86.36%                           | 82.35%                                    |
|       | 0                            | 0.2 | 0.8    |                                  | 82.35%                                    |
|       | 0                            | 0.3 | 0.7    |                                  | 76.47%                                    |
|       | 0                            | 0.4 | 0.6    |                                  | 76.47%                                    |
|       | 0                            | 0.5 | 0.5    |                                  | 76.47%                                    |
|       | 0.1                          | 0   | 0.9    |                                  | 82.35%                                    |
|       | 0.1                          | 0.1 | 0.8    |                                  | 82.35%                                    |
|       | 0.1                          | 0.2 | 0.7    |                                  | 76.47%                                    |
|       | 0.1                          | 0.3 | 0.6    |                                  | 76.47%                                    |
|       | 0.1                          | 0.4 | 0.5    |                                  | 76.47%                                    |
|       | 0.2                          | 0   | 0.8    |                                  | 82.35%                                    |
|       | 0.2                          | 0.1 | 0.7    |                                  | 82.35%                                    |
|       | 0.2                          | 0.2 | 0.6    |                                  | 76.47%                                    |
|       | 0.2                          | 0.3 | 0.5    |                                  | 76.47%                                    |
|       | 0.3                          | 0   | 0.7    |                                  | 82.35%                                    |
|       | 0.3                          | 0.1 | 0.6    |                                  | 82.35%                                    |
|       | 0.3                          | 0.2 | 0.5    |                                  | 76.47%                                    |
|       | 0.4                          | 0   | 0.6    |                                  | 82.35%                                    |
| 0.4   | 0.1                          | 0.5 | 76.47% |                                  |                                           |
| 0.5   | 0                            | 0.5 | 82.35% |                                  |                                           |
| 2     | 0                            | 0.1 | 0.9    | 91.30%                           | 88.24%                                    |

|   |     |     |     |        |        |
|---|-----|-----|-----|--------|--------|
|   | 0   | 0.2 | 0.8 |        | 88.24% |
|   | 0.1 | 0   | 0.9 |        | 88.24% |
|   | 0.1 | 0.1 | 0.8 |        | 88.24% |
|   | 0.2 | 0   | 0.8 |        | 88.24% |
|   | 0.2 | 0.1 | 0.7 |        | 88.24% |
|   | 0.3 | 0   | 0.7 |        | 88.24% |
|   | 0.3 | 0.1 | 0.6 |        | 88.24% |
|   | 0.4 | 0   | 0.6 |        | 88.24% |
|   | 0.5 | 0   | 0.5 |        | 88.24% |
| 3 | 0   | 0.1 | 0.9 | 95.65% | 88.24% |
|   | 0   | 0.2 | 0.8 |        | 88.24% |
|   | 0   | 0.3 | 0.7 |        | 88.24% |
|   | 0   | 0.4 | 0.6 |        | 88.24% |
|   | 0   | 0.5 | 0.5 |        | 88.24% |
|   | 0.1 | 0   | 0.9 |        | 88.24% |
|   | 0.1 | 0.1 | 0.8 |        | 88.24% |
|   | 0.1 | 0.2 | 0.7 |        | 88.24% |
|   | 0.1 | 0.3 | 0.6 |        | 88.24% |
|   | 0.1 | 0.4 | 0.5 |        | 88.24% |
|   | 0.2 | 0   | 0.8 |        | 88.24% |
|   | 0.2 | 0.1 | 0.7 |        | 88.24% |
|   | 0.2 | 0.2 | 0.6 |        | 88.24% |
|   | 0.2 | 0.3 | 0.5 |        | 88.24% |
|   | 0.3 | 0   | 0.7 |        | 88.24% |
|   | 0.3 | 0.1 | 0.6 |        | 88.24% |
|   | 0.3 | 0.2 | 0.5 |        | 88.24% |
|   | 0.4 | 0   | 0.6 |        | 88.24% |
|   | 0.4 | 0.1 | 0.5 |        | 88.24% |
|   | 0.5 | 0   | 0.5 |        | 88.24% |
| 4 | 0   | 0.1 | 0.9 | 91.30% | 88.24% |
|   | 0   | 0.2 | 0.8 |        | 88.24% |
|   | 0   | 0.3 | 0.7 |        | 88.24% |
|   | 0   | 0.4 | 0.6 |        | 88.24% |
|   | 0   | 0.5 | 0.5 |        | 88.24% |
|   | 0   | 0.6 | 0.4 |        | 88.24% |
|   | 0   | 0.7 | 0.3 |        | 88.24% |
|   | 0   | 0.8 | 0.2 |        | 88.24% |
|   | 0   | 0.9 | 0.1 |        | 82.35% |
|   | 0   | 1   | 0   |        | 82.35% |
|   | 0.1 | 0   | 0.9 |        | 82.35% |
|   | 0.1 | 0.1 | 0.8 |        | 82.35% |
|   | 0.1 | 0.2 | 0.7 |        | 82.35% |
|   | 0.1 | 0.3 | 0.6 |        | 82.35% |

|   |     |     |     |        |        |
|---|-----|-----|-----|--------|--------|
|   | 0.1 | 0.4 | 0.5 |        | 82.35% |
|   | 0.1 | 0.5 | 0.4 |        | 82.35% |
|   | 0.1 | 0.6 | 0.3 |        | 82.35% |
|   | 0.1 | 0.7 | 0.2 |        | 82.35% |
|   | 0.1 | 0.8 | 0.1 |        | 82.35% |
|   | 0.1 | 0.9 | 0   |        | 82.35% |
|   | 0.2 | 0   | 0.8 |        | 82.35% |
|   | 0.2 | 0.1 | 0.7 |        | 82.35% |
|   | 0.2 | 0.2 | 0.6 |        | 82.35% |
|   | 0.2 | 0.3 | 0.5 |        | 82.35% |
|   | 0.2 | 0.4 | 0.4 |        | 82.35% |
|   | 0.2 | 0.5 | 0.3 |        | 82.35% |
|   | 0.2 | 0.6 | 0.2 |        | 82.35% |
|   | 0.2 | 0.7 | 0.1 |        | 82.35% |
|   | 0.2 | 0.8 | 0   |        | 82.35% |
|   | 0.3 | 0   | 0.7 |        | 88.24% |
|   | 0.3 | 0.1 | 0.6 |        | 88.24% |
|   | 0.3 | 0.2 | 0.5 |        | 88.24% |
|   | 0.3 | 0.3 | 0.4 |        | 88.24% |
|   | 0.3 | 0.4 | 0.3 |        | 88.24% |
|   | 0.3 | 0.5 | 0.2 |        | 88.24% |
|   | 0.3 | 0.6 | 0.1 |        | 88.24% |
|   | 0.3 | 0.7 | 0   |        | 88.24% |
|   | 0.4 | 0   | 0.6 |        | 88.24% |
|   | 0.4 | 0.1 | 0.5 |        | 88.24% |
|   | 0.4 | 0.2 | 0.4 |        | 88.24% |
|   | 0.4 | 0.3 | 0.3 |        | 88.24% |
|   | 0.4 | 0.4 | 0.2 |        | 88.24% |
|   | 0.4 | 0.5 | 0.1 |        | 88.24% |
|   | 0.4 | 0.6 | 0   |        | 88.24% |
|   | 0.5 | 0   | 0.5 |        | 88.24% |
|   | 0.5 | 0.1 | 0.4 |        | 88.24% |
|   | 0.5 | 0.2 | 0.3 |        | 88.24% |
|   | 0.5 | 0.3 | 0.2 |        | 88.24% |
|   | 0.5 | 0.4 | 0.1 |        | 82.35% |
|   | 0.5 | 0.5 | 0   |        | 82.35% |
| 5 | 0   | 0.1 | 0.9 | 91.30% | 82.35% |
|   | 0   | 0.2 | 0.8 |        | 82.35% |
|   | 0   | 0.3 | 0.7 |        | 82.35% |
|   | 0   | 0.4 | 0.6 |        | 82.35% |
|   | 0   | 0.5 | 0.5 |        | 82.35% |
|   | 0.1 | 0   | 0.9 |        | 82.35% |
|   | 0.1 | 0.1 | 0.8 |        | 82.35% |

|  |     |     |     |  |        |
|--|-----|-----|-----|--|--------|
|  | 0.1 | 0.2 | 0.7 |  | 82.35% |
|  | 0.1 | 0.3 | 0.6 |  | 82.35% |
|  | 0.1 | 0.4 | 0.5 |  | 82.35% |
|  | 0.2 | 0   | 0.8 |  | 82.35% |
|  | 0.2 | 0.1 | 0.7 |  | 82.35% |
|  | 0.2 | 0.2 | 0.6 |  | 82.35% |
|  | 0.2 | 0.3 | 0.5 |  | 82.35% |
|  | 0.3 | 0   | 0.7 |  | 82.35% |
|  | 0.3 | 0.1 | 0.6 |  | 82.35% |
|  | 0.3 | 0.2 | 0.5 |  | 82.35% |
|  | 0.4 | 0   | 0.6 |  | 82.35% |
|  | 0.4 | 0.1 | 0.5 |  | 82.35% |
|  | 0.5 | 0   | 0.5 |  | 82.35% |

**Table S8** Automated weighting analysis for glass transition temperature of polymers dataset (True external dataset 3)

| <b>Model</b> | <b>Combination found with model</b> |     |     | <b>% Correct predictions (Test set)</b> | <b>% Correct predictions (True external set)</b> |
|--------------|-------------------------------------|-----|-----|-----------------------------------------|--------------------------------------------------|
| 1            | 0                                   | 0.1 | 0.9 | 86.54%                                  | 68.42%                                           |
|              | 0                                   | 0.2 | 0.8 |                                         | 68.42%                                           |
|              | 0.1                                 | 0   | 0.9 |                                         | 68.42%                                           |
|              | 0.1                                 | 0.1 | 0.8 |                                         | 68.42%                                           |
|              | 0.2                                 | 0   | 0.8 |                                         | 68.42%                                           |
|              | 0.2                                 | 0.1 | 0.7 |                                         | 68.42%                                           |
|              | 0.3                                 | 0   | 0.7 |                                         | 68.42%                                           |
|              | 0.3                                 | 0.1 | 0.6 |                                         | 68.42%                                           |
|              | 0.4                                 | 0   | 0.6 |                                         | 68.42%                                           |
|              | 0.5                                 | 0   | 0.5 |                                         | 68.42%                                           |
| 2            | 0                                   | 0.1 | 0.9 | 88.46%                                  | 84.21%                                           |
|              | 0                                   | 0.2 | 0.8 |                                         | 84.21%                                           |
|              | 0.1                                 | 0   | 0.9 |                                         | 84.21%                                           |
|              | 0.1                                 | 0.1 | 0.8 |                                         | 84.21%                                           |
|              | 0.2                                 | 0   | 0.8 |                                         | 84.21%                                           |
|              | 0.2                                 | 0.1 | 0.7 |                                         | 84.21%                                           |
|              | 0.3                                 | 0   | 0.7 |                                         | 84.21%                                           |
|              | 0.3                                 | 0.1 | 0.6 |                                         | 84.21%                                           |
|              | 0.4                                 | 0   | 0.6 |                                         | 84.21%                                           |
|              | 0.5                                 | 0   | 0.5 |                                         | 84.21%                                           |

|   |     |     |     |        |        |
|---|-----|-----|-----|--------|--------|
| 3 | 0   | 0.1 | 0.9 | 92.31% | 86.84% |
|   | 0   | 0.2 | 0.8 |        | 86.84% |
|   | 0.1 | 0   | 0.9 |        | 86.84% |
|   | 0.1 | 0.1 | 0.8 |        | 86.84% |
|   | 0.2 | 0   | 0.8 |        | 86.84% |
|   | 0.2 | 0.1 | 0.7 |        | 86.84% |
| 4 | 0   | 0.1 | 0.9 | 94.23% | 78.95% |
|   | 0   | 0.2 | 0.8 |        | 78.95% |
|   | 0.1 | 0   | 0.9 |        | 78.95% |
|   | 0.1 | 0.1 | 0.8 |        | 78.95% |
|   | 0.2 | 0   | 0.8 |        | 78.95% |
| 5 | 0   | 0.1 | 0.9 | 86.54% | 78.95% |
|   | 0   | 0.2 | 0.8 |        | 78.95% |
|   | 0.1 | 0   | 0.9 |        | 78.95% |
|   | 0.1 | 0.1 | 0.8 |        | 78.95% |
|   | 0.2 | 0   | 0.8 |        | 78.95% |
|   | 0.2 | 0.1 | 0.7 |        | 81.58% |

**Table S9** Automated weighting analysis for sweetness potency of organic molecules (True external dataset 4)

| Model | Combination found with model |     |        | % Correct predictions (Test set) | % Correct predictions (True external set) |
|-------|------------------------------|-----|--------|----------------------------------|-------------------------------------------|
| 1     | 0                            | 0.5 | 0.5    | 95%                              | 80.00%                                    |
|       | 0                            | 0.6 | 0.4    |                                  | 80.00%                                    |
|       | 0                            | 0.7 | 0.3    |                                  | 80.00%                                    |
|       | 0                            | 0.8 | 0.2    |                                  | 80.00%                                    |
|       | 0                            | 0.9 | 0.1    |                                  | 80.00%                                    |
|       | 0                            | 1   | 0      |                                  | 80.00%                                    |
|       | 0.1                          | 0.4 | 0.5    |                                  | 80.00%                                    |
|       | 0.1                          | 0.5 | 0.4    |                                  | 80.00%                                    |
|       | 0.1                          | 0.6 | 0.3    |                                  | 80.00%                                    |
|       | 0.1                          | 0.7 | 0.2    |                                  | 80.00%                                    |
|       | 0.1                          | 0.8 | 0.1    |                                  | 80.00%                                    |
|       | 0.1                          | 0.9 | 0      |                                  | 80.00%                                    |
|       | 0.2                          | 0.3 | 0.5    |                                  | 80.00%                                    |
|       | 0.2                          | 0.4 | 0.4    |                                  | 80.00%                                    |
|       | 0.2                          | 0.5 | 0.3    |                                  | 80.00%                                    |
|       | 0.2                          | 0.6 | 0.2    |                                  | 80.00%                                    |
| 0.2   | 0.7                          | 0.1 | 80.00% |                                  |                                           |
| 0.2   | 0.8                          | 0   | 80.00% |                                  |                                           |
| 2     | 0                            | 0.1 | 0.9    | 95%                              | 83.33%                                    |
|       | 0                            | 0.2 | 0.8    |                                  | 83.33%                                    |
|       | 0.1                          | 0   | 0.9    |                                  | 83.33%                                    |
|       | 0.1                          | 0.1 | 0.8    |                                  | 83.33%                                    |
|       | 0.2                          | 0   | 0.8    |                                  | 83.33%                                    |
|       | 0.2                          | 0.1 | 0.7    |                                  | 83.33%                                    |
|       | 0.3                          | 0   | 0.7    |                                  | 83.33%                                    |
|       | 0.3                          | 0.1 | 0.6    |                                  | 83.33%                                    |
|       | 0.4                          | 0   | 0.6    |                                  | 83.33%                                    |
|       | 0.5                          | 0   | 0.5    |                                  | 83.33%                                    |
| 3     | 0                            | 0.5 | 0.5    | 80%                              | 75%                                       |
|       | 0.1                          | 0.5 | 0.4    |                                  | 75%                                       |
|       | 0.2                          | 0.5 | 0.3    |                                  | 75%                                       |
| 4     | 0                            | 0.5 | 0.5    | 93.75%                           | 73.33%                                    |
|       | 0                            | 0.6 | 0.4    |                                  | 73.33%                                    |
|       | 0                            | 0.7 | 0.3    |                                  | 73.33%                                    |
|       | 0                            | 0.8 | 0.2    |                                  | 73.33%                                    |
|       | 0                            | 0.9 | 0.1    |                                  | 73.33%                                    |

|   |     |     |     |       |        |
|---|-----|-----|-----|-------|--------|
|   | 0   | 1   | 0   |       | 73.33% |
|   | 0.1 | 0.4 | 0.5 |       | 73.33% |
|   | 0.1 | 0.5 | 0.4 |       | 73.33% |
|   | 0.1 | 0.6 | 0.3 |       | 73.33% |
|   | 0.1 | 0.7 | 0.2 |       | 73.33% |
|   | 0.1 | 0.8 | 0.1 |       | 73.33% |
|   | 0.1 | 0.9 | 0   |       | 73.33% |
|   | 0.2 | 0.3 | 0.5 |       | 73.33% |
|   | 0.2 | 0.4 | 0.4 |       | 73.33% |
|   | 0.2 | 0.5 | 0.3 |       | 73.33% |
|   | 0.2 | 0.6 | 0.2 |       | 73.33% |
|   | 0.2 | 0.7 | 0.1 |       | 73.33% |
|   | 0.2 | 0.8 | 0   |       | 73.33% |
|   | 0.3 | 0.2 | 0.5 |       | 73.33% |
|   | 0.3 | 0.3 | 0.4 |       | 73.33% |
|   | 0.3 | 0.4 | 0.3 |       | 73.33% |
|   | 0.3 | 0.5 | 0.2 |       | 73.33% |
|   | 0.3 | 0.6 | 0.1 |       | 73.33% |
|   | 0.3 | 0.7 | 0   |       | 73.33% |
|   | 0.4 | 0.1 | 0.5 |       | 73.33% |
|   | 0.4 | 0.2 | 0.4 |       | 73.33% |
|   | 0.4 | 0.3 | 0.3 |       | 73.33% |
|   | 0.4 | 0.4 | 0.2 |       | 73.33% |
|   | 0.4 | 0.5 | 0.1 |       | 73.33% |
|   | 0.4 | 0.6 | 0   |       | 73.33% |
|   | 0.5 | 0   | 0.5 |       | 73.33% |
|   | 0.5 | 0.1 | 0.4 |       | 73.33% |
|   | 0.5 | 0.2 | 0.3 |       | 73.33% |
|   | 0.5 | 0.3 | 0.2 |       | 73.33% |
|   | 0.5 | 0.4 | 0.1 |       | 73.33% |
|   | 0.5 | 0.5 | 0   |       | 73.33% |
| 5 | 0   | 0.1 | 0.9 | 92.5% | 86.67% |
|   | 0   | 0.2 | 0.8 |       | 86.67% |
|   | 0   | 0.3 | 0.7 |       | 86.67% |
|   | 0   | 0.4 | 0.6 |       | 86.67% |
|   | 0   | 0.5 | 0.5 |       | 86.67% |
|   | 0   | 0.6 | 0.4 |       | 86.67% |
|   | 0   | 0.7 | 0.3 |       | 86.67% |
|   | 0   | 0.8 | 0.2 |       | 86.67% |
|   | 0   | 0.9 | 0.1 |       | 86.67% |
|   | 0   | 1   | 0   |       | 86.67% |
|   | 0.1 | 0   | 0.9 |       | 86.67% |
|   | 0.1 | 0.1 | 0.8 |       | 86.67% |

|  |     |     |     |  |        |
|--|-----|-----|-----|--|--------|
|  | 0.1 | 0.2 | 0.7 |  | 86.67% |
|  | 0.1 | 0.3 | 0.6 |  | 86.67% |
|  | 0.1 | 0.4 | 0.5 |  | 86.67% |
|  | 0.1 | 0.5 | 0.4 |  | 86.67% |
|  | 0.1 | 0.6 | 0.3 |  | 86.67% |
|  | 0.1 | 0.7 | 0.2 |  | 86.67% |
|  | 0.1 | 0.8 | 0.1 |  | 86.67% |
|  | 0.1 | 0.9 | 0   |  | 86.67% |
|  | 0.2 | 0   | 0.8 |  | 86.67% |
|  | 0.2 | 0.1 | 0.7 |  | 86.67% |
|  | 0.2 | 0.2 | 0.6 |  | 86.67% |
|  | 0.2 | 0.3 | 0.5 |  | 86.67% |
|  | 0.2 | 0.4 | 0.4 |  | 86.67% |
|  | 0.2 | 0.5 | 0.3 |  | 86.67% |
|  | 0.2 | 0.6 | 0.2 |  | 86.67% |
|  | 0.2 | 0.7 | 0.1 |  | 86.67% |
|  | 0.2 | 0.8 | 0   |  | 86.67% |
|  | 0.3 | 0   | 0.7 |  | 86.67% |
|  | 0.3 | 0.1 | 0.6 |  | 86.67% |
|  | 0.3 | 0.2 | 0.5 |  | 86.67% |
|  | 0.3 | 0.3 | 0.4 |  | 86.67% |
|  | 0.3 | 0.4 | 0.3 |  | 86.67% |
|  | 0.3 | 0.5 | 0.2 |  | 86.67% |
|  | 0.3 | 0.6 | 0.1 |  | 86.67% |
|  | 0.3 | 0.7 | 0   |  | 86.67% |
|  | 0.4 | 0   | 0.6 |  | 86.67% |
|  | 0.4 | 0.1 | 0.5 |  | 86.67% |
|  | 0.4 | 0.2 | 0.4 |  | 86.67% |
|  | 0.4 | 0.3 | 0.3 |  | 86.67% |
|  | 0.4 | 0.4 | 0.2 |  | 86.67% |
|  | 0.4 | 0.5 | 0.1 |  | 86.67% |
|  | 0.4 | 0.6 | 0   |  | 86.67% |
|  | 0.5 | 0   | 0.5 |  | 86.67% |
|  | 0.5 | 0.1 | 0.4 |  | 86.67% |
|  | 0.5 | 0.2 | 0.3 |  | 86.67% |
|  | 0.5 | 0.3 | 0.2 |  | 86.67% |
|  | 0.5 | 0.4 | 0.1 |  | 86.67% |
|  | 0.5 | 0.5 | 0   |  | 86.67% |
